# Supplementary material for: Bacterial Peptidoglycan Fragments Differentially Regulate Innate Immune Signaling
Source: PubMed Central journal article supplement — ACS Cent Sci. 2021 Mar 23;7(4):688–96. doi: 10.1021/acscentsci.1c00200 (PMC8155477; doi:10.1021/acscentsci.1c00200), 2021-03-23
Supplement: oc1c00200_si_001.pdf [file oc1c00200_si_001.pdf]

# Bacterial Peptidoglycan Fragments Differentially Regulate Innate Immune Signaling

Klare L. Bersch<sup>†1</sup>, Kristen E. DeMeester<sup>†1</sup>, Rachid Zagani<sup>2</sup>, Shuyuan Chen<sup>3</sup>, Kimberly A. Wodzanowski<sup>1</sup>, Shuzhen Liu<sup>3</sup>, Siavash Mashayekh<sup>1</sup>, Hans-Christian Reinecker<sup>2, 3, #\*</sup>, and Catherine L. Grimes<sup>1,4#\*</sup>.

<sup>1</sup>Department of Chemistry and Biochemistry, University of Delaware, Newark, DE 19716, USA.

<sup>2</sup>Department of Medicine, Gastrointestinal Unit and Center for the Study of Inflammatory Bowel Disease, Massachusetts General Hospital, Harvard Medical School, Boston, MA 02114, USA.

<sup>3</sup>Department of Medicine, Division of Digestive and Liver Diseases and Department of Immunology, University of Texas Southwestern Medical Center, 5959 Harry Hines Boulevard, Dallas, TX 75390, USA.

<sup>4</sup>Department of Biological Sciences, University of Delaware, Newark, DE 19716, USA.

<sup>†</sup>Authors contributed equally

# Shared senior authorship

\*Correspondence to: The University of Delaware, Department of Chemistry and Biochemistry, Newark, DE 19716, 302-831-2985, [cgrimes@udel.edu](mailto:cgrimes@udel.edu), University of Texas Southwestern Medical Center, Division of Digestive and Liver Diseases, 5959 Harry Hines Boulevard, Dallas, TX 75390, USA, [hans-christian.reinecker@utsouthwestern.edu](mailto:hans-christian.reinecker@utsouthwestern.edu)

## Table of Contents

|       |                                                                                          |     |
|-------|------------------------------------------------------------------------------------------|-----|
| I.    | <b><u>Materials and instrumentation</u></b> .....                                        | S3  |
| II.   | <b><u>Synthesis of disaccharide fragments</u></b> .....                                  | S4  |
| III.  | <b><u>Bone marrow derived macrophages culture and treatment</u></b> .....                | S10 |
| IV.   | <b><u>Real-time quantitative-PCR</u></b> .....                                           | S10 |
|       | RNA isolation, cDNA synthesis and qRT PCRs/Primers                                       |     |
|       | PG library ( <b>SI Figure 1</b> ) .....                                                  | S13 |
|       | Results for qRT-PCR Initial Screen ( <b>SI Figure 2</b> ).....                           | S14 |
|       | qRT-PCR GMTP vs. MDP 4 hour replicates ( <b>SI Figure 3</b> ).....                       | S15 |
|       | qRT-PCR Numerical $\Delta\Delta CT$ Data for Main Text Figure ( <b>SI Table 1</b> )..... | S16 |
| V.    | <b><u>RNA Sequencing</u></b> .....                                                       | S16 |
|       | RNAseq protocols                                                                         |     |
|       | Data Processing and Analysis                                                             |     |
| VI.   | <b><u>Biochemical Assays</u></b> .....                                                   | S17 |
|       | Luminex protocol                                                                         |     |
|       | Western blot analysis ( <b>SI Figure 4</b> ).....                                        | S18 |
|       | ELISA                                                                                    |     |
| VII.  | <b><u>Peptidoglycan Enzymatic Degradation and Mass Spectrometry Analysis</u></b> .....   | S19 |
|       | <i>Lactobacillus acidophilus</i> growth and enzymatic degradation                        |     |
|       | LC- Mass Spectrometry Method                                                             |     |
|       | Results and HRMS Spectra of Identified fragments ( <b>SI Table 2</b> ) .....             | S20 |
| VIII. | <b><u>NMR Spectra of Synthetic Compounds</u></b> .....                                   | S23 |
| IX.   | <b><u>HRMS Spectra of Synthetic Compounds</u></b> .....                                  | S30 |
| X.    | <b><u>References</u></b> .....                                                           | S32 |

## **I. Materials and Instrumentation**

### **Materials.**

All chemicals were purchased from Millipore-Sigma, ThermoFisher Scientific, ChemImpex and used without further purification unless otherwise noted. All solvents were reagent grade anhydrous purchased from Millipore-Sigma. Deuterated NMR solvents were purchased from Cambridge Isotope Laboratories. All compounds were purified on normal phase silica with flash chromatography unless otherwise noted. Total RNA was extracted using RNeasy Mini isolation kit (Qiagen). RNase-Free DNase Set (Qiagen) for DNase-digestion. QuantiTect Reverse Transcription Kit (Qiagen) was used for cDNA Synthesis. All primers were obtained from Eurofins Genomics LLC. Sybr SsoAdvanced Universal Green Supermix was obtained from Bio-Rad.

### **Instrumentation.**

NMR spectra were recorded on either a Bruker AVIII 400 MHz or AV III 600 MHz spectrometers. High Resolution Mass Spectrometry (HRMS, ESI) data was obtained at the University of Delaware Mass Spectrometry Facility (Thermo Q-Exactive Orbitrap). Low-Resolution Mass Spectrometry (LRMS, ESI) were obtained using an ACQUITY UPLC H-Class/SQD2 or Shimadzu LCMS 2020 at the University of Delaware Mass Spectrometry Facility. Compounds purified on reverse phase were conducted on a Waters Autopurification System (2767 Sample Manager with HPLC and SQD2 MS with ESIA) with a SunFire Prep C18 OBD 5 $\mu$ M 18x100mm Column. PCR was performed on a 7300 Applied Biosystems RTPCR. RNA and DNA concentrations were obtained via nanodrop (Thermo Scientific). Whole genome RNA Sequencing data was generated on a Illumina NextSeq 550 system at the University of Delaware Sequencing Core. Luminex was performed at the University of Maryland Baltimore Cytokine Core using a Luminex MagPix reader.

## II. Synthesis of disaccharide fragments

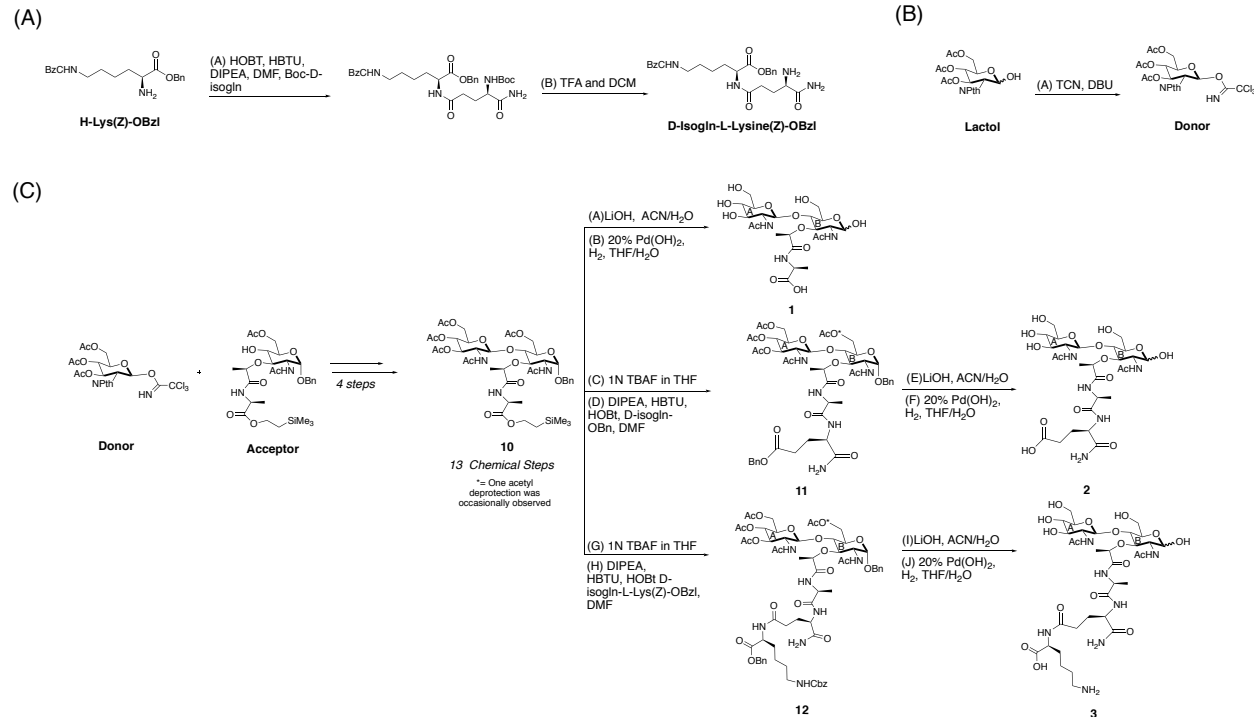

All experiments were performed with proper PPE (goggles, flame resistant lab coat and nitrile gloves) and inside a fume hood. Substances of notable hazard include Pd(OH)<sub>2</sub>, TBAF, HOBt and HBTU. Summary of their potential hazard is below and we note that we did not encounter any in our work:

Caution! Palladium Hydroxide (CAS: 12135-22-7) is extremely flammable and will ignite when dry. This reagent should only be handled by those who are trained to use it. It is recommended that the reagent is weighed out in a glass vial and slowly poured into a reaction flask containing solvent with a funnel. Hydrogen balloon should not be in the fume hood when this is being performed in case of spontaneous ignition. Palladium waste should be discarded in its own waste receptacle containing celite and water to prevent spontaneous ignition.

Caution! TBAF (CAS: 12135-22-7) is a fluoride source. It can cause skin corrosion and serious eye damage. In case of skin contact, a calcium gluconate kit should be handy. Fluoride sources, such as TBAF, can transfer fluoride ion into the skin like HF so one should have gel for this too.

Caution! HOBt (CAS: 123333-53-9) and HBTU (CAS: 94790-37-1). Both coupling reagents are flammable solids and cause skin and eye irritation. In addition to these warnings, HBTU can also cause respiratory irritation. Coupling reagent allergies have been reported recently in literature. So, one should take caution with initial handling to ensure no allergies exist.

**D-isoglu- L-Lys(Z)-OBzl:** Boc-D-Glu-NH<sub>2</sub> (0.040 g, 0.16 mmols, 1 eq), HBTU (0.073 g, 0.195 mmols, 1.2 eq), HOBt (0.026 g, 0.195 mmols, 1.2 eq) and DIPEA (0.11 mLs, 0.64 mmols, 4 eq) were combined in a reaction round bottom flask with 1.1 mLs of anhydrous DMF on ice for 10

min. L-Lys(Z)-OBzl (0.079 g, 0.16 mmols, 1.2 eq) was added. After 24 hours, the reaction was diluted with ethyl acetate. The organic layer was then washed with 1N HCl, saturated sodium bicarbonate and brine (the water layers were re-extracted if product was detected in any of the water layers). The organic layer was dried with sodium sulfate and condensed. The crude was purified via column chromatography with a slow gradient (0-5% MeOH in DCM) to yield a white solid (50mg, 50%). The protected product (0.07g, 0.118mmols, 1eq) was then dissolved in 0.4 mLs of anhydrous DCM and then 0.2 mLs of TFA was added. The reaction was left to stir for 1.5 hours. The product was then condensed resuspended in water and lyophilized to yield a white fluffy powder (71 mg, quantitative). NMR and mass spectrometry data matched previously reported data<sup>[1a]</sup>.

**Acceptor:** Synthesized according to precedence. NMR matched previously reported<sup>[2]</sup>.

**Donor:** Lactol (4.25 g, 9.77 mmols, 1 eq) was dissolved in 49 mLs of DCM then trichloroacetonitrile (19.5 mLs, 195 mmols, 20 eq) was added on ice followed by DBU (0.145 mLs, 0.977 mmols, 0.1 eq). The reaction stirred at 0°C for 5 hours the reaction was then condensed and purified by column chromatography with 0-40% EtOAc/Hexane to yield a white solid (5.18 g, 92%). NMR matched previously reported<sup>[2d, 3]</sup>.

**(S)-2-((R)-2-(((3R,4R,5S,6R)-3-acetamido-5-(((2S,3R,4R,5S,6R)-3-acetamido-4,5-dihydroxy-6-(hydroxymethyl)tetrahydro-2H-pyran-2-yl)oxy)-2-hydroxy-6-(hydroxymethyl)tetrahydro-2H-pyran-4-yl)oxy)propanamido)propanoic acid (compound 1):** Compound **10**<sup>[2]</sup> (0.032 g, 0.0345 mmol, 1 eq) was dissolved in 1.7 mL acetonitrile. Then 1.7 mL of 0.1 M LiOH<sub>(aq)</sub> was added dropwise. The reaction stirred overnight and was partially complete. An additional 0.35 mL 0.1 M LiOH<sub>(aq)</sub> was added and after two hours another 0.35 mL of 0.1M LiOH (aq) was added and left to stir five and half hours. Once complete (M+1=658), the reaction was quenched with acetic acid (monitored with pH paper to ~7), filtered, condensed and placed on high vac overnight. The product was re-suspended in 0.79 mL of THF and then 2.45 mL of DI water was added along with 0.21 mL of acetic acid. 20% Pd(OH)<sub>2</sub> (12 mg, 0.0172 mmol, 0.5 eq) was added, and the flask was evacuated and filled with hydrogen three times. After stirring overnight, the reaction was confirmed as complete then filtered and condensed. The residue was purified via reverse phase SunFire Prep C18 column using an Autopure (0-20% acetonitrile in water with 0.1% Formic acid over 5 min) to yield a white powder (11 mg, 56%). α:β ratio 1:0.3 for carbohydrate B (anomeric center). α isomer is designated as major isomer, β is designated as minor isomer. NMR assignments based on 2D experiments (α major isomer is predominantly assigned). <sup>1</sup>H NMR (600 MHz, Deuterium Oxide) δ 5.16 (d, *J* = 3.4 Hz, 1H, H<sub>1B</sub>major), 4.59 (d, *J* = 7.4 Hz, 0.24H, H<sub>1B</sub>minor), 4.50 (d, *J* = 8.4 Hz, 1H, H<sub>1A</sub>major), 4.48 (d, *J* = 8.4 Hz, 0.40H, H<sub>1A</sub>minor), 4.44 (q, *J* = 6.6 Hz, 1H, CH-propionic<sub>major</sub>), 4.38 (q, *J* = 6.5 Hz, 0.43H, CH-propionic<sub>minor</sub>), 4.11 (qd, *J* = 7.3, 4.0 Hz, 1.59H, CH-alanine<sub>major/minor</sub>), 3.92 – 3.88 (m, 1.49H, H<sub>6A'</sub>major, H<sub>6A'</sub>minor), 3.86 – 3.62 (m, 12.82H, H<sub>6B'</sub>minor, H<sub>2B</sub>major, H<sub>6B'</sub>major, H<sub>4B</sub>major, H<sub>4B</sub>minor, H<sub>6B''</sub>major, H<sub>6B</sub>minor, H<sub>6A''</sub>major, H<sub>6A''</sub>minor, H<sub>3B</sub>major, H<sub>2A</sub>major, H<sub>2A</sub>minor, H<sub>5B</sub>major, H<sub>2B</sub>minor), 3.52 (ddd, *J* = 10.5, 7.9, 6.2 Hz, 1.64H, H<sub>3A</sub>major, H<sub>3A</sub>minor), 3.45 (ddd, *J* = 9.8, 5.1, 2.1 Hz, 0.52H, H<sub>3B</sub>minor), 3.43 – 3.34 (m, 3.3H, H<sub>4A</sub>major, H<sub>5A</sub>major, H<sub>4A</sub>minor, H<sub>5A</sub>minor), 2.01 (s, 5H, NHAcetate<sub>2A</sub>major/minor), 1.94 (s, 3H, NHAcetate<sub>2B</sub>major), 1.92 (s, 1H, NHAcetate<sub>2B</sub>minor), 1.37 – 1.30 (m, 10H, CH<sub>3</sub>-Alanine<sub>major/minor</sub>, CH<sub>3</sub>-Propionic<sub>major/minor</sub>). <sup>13</sup>C NMR (151 MHz, D<sub>2</sub>O) δ 174.70 (NH-Acetate<sub>2A</sub>major/minor), 174.64(NH-Acetate<sub>2B</sub>minor), 174.35(Carbonyl-Alanine<sub>major/minor</sub>), 174.28 (NH-Acetate<sub>2B</sub>major),

173.60 (Propionic-Carbonyl<sub>major/minor</sub>), 100.50 (C<sub>1A</sub><sub>minor</sub>), 100.39 (C<sub>1A</sub><sub>major</sub>), 95.27(C<sub>1B</sub><sub>minor</sub>), 90.44(C<sub>1B</sub><sub>major</sub>), 79.05 (C<sub>5B</sub><sub>minor</sub>), 78.29(C-Propionic<sub>minor</sub>), 78.03 (C-Propionic<sub>major</sub>), 76.59(C<sub>3B</sub><sub>major</sub>), 76.19(C<sub>5A</sub><sub>minor</sub>), 76.16(C<sub>5A</sub><sub>major</sub>), 75.54(C<sub>4B</sub><sub>minor</sub>), 75.50(C<sub>4B</sub><sub>major</sub>), 75.17(C<sub>3B</sub><sub>minor</sub>), 73.62(C<sub>3A</sub><sub>major/minor</sub>), 70.99(C<sub>5B</sub><sub>major</sub>), 70.32(C<sub>4A</sub><sub>major</sub>), 70.30 (C<sub>4A</sub><sub>minor</sub>), 61.12(C<sub>6A</sub><sub>major</sub>), 61.11(C<sub>6A</sub><sub>minor</sub>), 59.93(C<sub>6B</sub><sub>minor</sub>), 59.83(C<sub>6B</sub><sub>major</sub>), 56.09(C<sub>2A</sub><sub>major</sub>), 56.02 (C<sub>2A</sub><sub>minor</sub>), 55.41 (C<sub>2B</sub><sub>minor</sub>), 53.41 (C<sub>2B</sub><sub>major</sub>), 51.20 (C-Alanine<sub>major/minor</sub>[based on HSQC]) 22.45(C<sub>2B</sub>-Acetate<sub>minor</sub>), 22.16 (C<sub>2B</sub>-Acetate<sub>major</sub>), 22.13 (C<sub>2A</sub>-Acetate<sub>major</sub>), 17.78(CH<sub>3</sub>-Propionic<sub>major</sub>), 17.27 (CH<sub>3</sub>-Propionic<sub>minor</sub>), 17.03 (CH<sub>3</sub>-Alanine<sub>major</sub>), 16.95(CH<sub>3</sub>-Alanine<sub>minor</sub>). HRMS m/z: [M+H]<sup>+</sup> calcd C<sub>22</sub>H<sub>38</sub>N<sub>3</sub>O<sub>14</sub><sup>+</sup> 568.23483; Found 568.23615.

**(2R,3S,4R,5R,6S)-5-acetamido-6-(((2R,3S,4R,5R,6S)-5-acetamido-4-(((R)-1-(((S)-1-(((R)-1-amino-5-(benzyloxy)-1,5-dioxopentan-2-yl)amino)-1-oxopropan-2-yl)amino)-1-oxopropan-2-yl)oxy)-6-(benzyloxy)-2-(hydroxymethyl)tetrahydro-2H-pyran-3-yl)oxy)-2-(acetoxymethyl)tetrahydro-2H-pyran-3,4-diyl diacetate (compound 11):** Compound **10**<sup>[2]</sup> (0.180 g, 0.19 mmol, 1 eq) was dissolved in 4 mL of anhydrous THF. Then 1M TBAF in THF (0.77 mL, 0.77 mmol, 4 eq) was added. The reaction was partially complete in 3 hours, so an additional 0.3 mL (0.3 mmol, 2 eq) of 1M TBAF in THF was added. Reaction was done in an hour and condensed. The residue was dissolved in EtOAc and washed 2 x 1N HCl (water layer was checked for any residual product and re-extracted). The organic layer was dried, condensed and placed under high vacuum for one hour. A short column (2-7% EtOH in DCM) was run to remove residual TBAF and the product was used in the subsequent reaction (53%= -acetate product, 8%= product identified via mass spec). The major product (0.08 g, 0.101 mmol, 1 eq) and *D*-isoglutamine-benzylester HCl (0.037 g, 0.137 mmol, 1.2 eq) was then dissolved in 0.685 mL of DMF on ice. Then HOBt (0.0186 g, 0.137 mmol, 1.2 eq) and HBTU (0.052 g, 0.137 mmol, 1.2 eq) were added and stirred on ice for 3 minutes. DIPEA (0.079 mL, 0.46 mmol, 4 eq) was added dropwise on ice. The reaction then was warmed to room temperature and stirred till complete (1.5 hours). The reaction was condensed and diluted with EtOAc. The organic layer was washed 1N HCl, saturated bicarbonate, and brine. The organic layer was dried, condensed and purified via column chromatography (0-10% MeOH in DCM) to yield a white solid (product (-acetate)= 46 mg, 24% over two steps). Note: During reactions one acetate was deprotected and reported as the final product. <sup>1</sup>H NMR (400 MHz, DMSO-*d*<sub>6</sub>) δ 8.47 (d, *J* = 6.1 Hz, 1H, NH<sub>B</sub>Acetate), 8.28 (d, *J* = 8.2 Hz, 1H, NH-D-isoglutamine), 8.09 (dd, *J* = 19.8, 8.0 Hz, 2H, NH<sub>A</sub>Acetate), 7.41 – 7.20 (m, 10H, C<sub>1B</sub>-OBn, D-isoglutamine-OBn), 5.25 (t, *J* = 9.9 Hz, 1H, H<sub>3A</sub>), 5.08 (s, 2H, D-isoglutamine-CH<sub>2</sub>Bn), 4.96 – 4.85 (m, 2H, H<sub>1B</sub>, H<sub>4A</sub>), 4.82 – 4.68 (m, 2H, H<sub>1A</sub>, H<sub>6B</sub>-OH), 4.62 (d, *J* = 12.8 Hz, 1H, CH<sub>2</sub>OBn<sup>'</sup>), 4.53 – 4.35 (m, 3H, CH<sub>2</sub>OBn<sup>''</sup>, CH-propionic, CH-Alanine), 4.27 – 4.13 (m, 2H, CH-D-isoglutmaine, H<sub>6A</sub><sup>'</sup>), 3.94 (d, *J* = 11.9 Hz, 1H, H<sub>6A</sub><sup>''</sup>), 3.84 – 3.51 (m, 6H, H<sub>2A</sub>, H<sub>5A</sub>, H<sub>2B</sub>, H<sub>4B</sub>, H<sub>6B</sub><sup>'''</sup>), 3.50 – 3.43 (m, 2H, H<sub>5B</sub>, H<sub>3B</sub>), 2.36 (t, *J* = 8.3 Hz, 2H, CH<sub>2</sub>-D-isoglutamine), 2.04 (CH<sub>2</sub>-D-isoglutamine<sup>'</sup>) 1.96 (d, *J* = 4.4 Hz, 6H, AcetateH<sub>4,6A</sub>), 1.92 (s, 3H, AcetateH<sub>3A</sub>), 1.80 (s, 4H, NHAcetateA, CH<sub>2</sub>-D-isoglutamine<sup>'''</sup>), 1.75 (s, 3H, NHAcetateB), 1.23 (dd, *J* = 26.0, 6.8 Hz, 6H, CH<sub>3</sub>-Alanine, CH<sub>3</sub>-Propionic). <sup>13</sup>C NMR (101 MHz, DMSO) δ 174.16 (propionic-Carbonyl), 173.37 (D-isoglutamine-carbonyl), 172.59 (Alanine-carbonyl), 172.51 (D-isoglutamine-carbonyl), 170.61 (C<sub>6A</sub>-Carbonyl), 170.05 (NHAcetate-Caronyl), 170.03 (NHAcetate-Carbonyl), 170.02 (C<sub>3A</sub>-Carbonyl), 169.79 (C<sub>4A</sub>-Carbonyl) 138.09 (Aromatic), 136.60 (Aromatic), 128.90 (Aromatic), 128.68 (Aromatic), 128.47 (Aromatic), 128.38 (Aromatic), 127.92 (Aromatic), 127.83 (Aromatic), 99.68 (C<sub>1A</sub>), 95.95 (C<sub>1B</sub>), 76.41 (CH-Propionic), 76.23 (C<sub>4B</sub>), 75.72 (C<sub>3B</sub>), 72.63 (C<sub>3A</sub>), 72.13 (C<sub>5B</sub>), 70.65

(C<sub>5</sub>A), 68.86 (C<sub>4</sub>A), 68.64 (C<sub>1</sub>B-CH<sub>2</sub>OBn), 65.96 (D-isoglutamine-CH<sub>2</sub>OBn), 62.16 (C<sub>6</sub>A), 59.46 (C<sub>6</sub>B), 54.62 (C<sub>2</sub>A), 54.16 (C<sub>2</sub>B), 51.96 (CH-D-isoglutamine), 48.56 (CH-Alanine), 30.44 (CH<sub>2</sub>D-isoglutamine), 27.49 (CH<sub>2</sub>D-isoglutamine), 23.11 (Acetate-CH<sub>3</sub>), 23.05 (Acetate-CH<sub>3</sub>), 20.89 (Acetate-CH<sub>3</sub>), 20.85 (Acetate-CH<sub>3</sub>), 20.78 (Acetate-CH<sub>3</sub>), 19.32 (CH<sub>3</sub>-Alanine), 19.21 (CH<sub>3</sub>-Propionic). Note: 1,4-Beta-linkage was confirmed via HMBC, C<sub>1</sub>A coupled to H<sub>4</sub>B and C<sub>4</sub>A coupled to H<sub>1</sub>B. Major product (-OAc). HRMS m/z: [M+H-OAc]<sup>+</sup> calcd C<sub>47</sub>H<sub>64</sub>N<sub>5</sub>O<sub>19</sub><sup>+</sup> 1002.41900; Found 1002.42053.

**(R)-4-((S)-2-((R)-2-(((3R,4R,5S,6R)-3-acetamido-5-(((2S,3R,4R,5S,6R)-3-acetamido-4,5-dihydroxy-6-(hydroxymethyl)tetrahydro-2H-pyran-2-yl)oxy)-2-hydroxy-6-(hydroxymethyl)tetrahydro-2H-pyran-4-yl)oxy)propanamido)propanamido)-5-amino-5-oxopentanoic acid (compound 2):** Mono-deacetylated compound **11** (0.05 g, 0.050 mmol, 1 eq) was dissolved in 2.5 mL of acetonitrile, and 2.5 mL of 0.1M LiOH<sub>(aq)</sub> was added slowly. The reaction was stirred for 2 hours and was quenched with acetic acid (monitored with pH paper to ~7), filtered and condensed (Mass spec, M+23= 808, de-acetylated and de-benzyl ester intermediate) and subsequently used in the next step. The residue was then suspended in 1.2 mL THF then 3.75 mL DI water and 0.3 mL of acetic acid was added. 20% Pd(OH)<sub>2</sub> (17.5 mg, 0.025 mmol, 0.5 eq) was added and the flask was evacuated and filled with hydrogen three times. After 4 hours, another portion of 20% Pd(OH)<sub>2</sub> (17.5 mg, 0.025 mmol, 0.5 eq) was added, and the flask was evacuated and filled with hydrogen three times. The reaction stirred for an additional 24 hours under hydrogen until all starting material consumed as observed by LC-MS. The reaction was filtered and evaporated under reduced pressure. The residue was purified via reverse phase SunFire Prep C18 column using an Autopure (0-30% Acetonitrile in water over 5 min with 0.1% formic acid at 20mL/min) to yield a white powder (12.7 mg, 37%). α:β ratio 1:0.2 for Carbohydrate B anomeric center. α isomer is designated as major isomer, β is designated as minor isomer. NMR assignments based on 2D experiments (α major isomer is predominantly assigned). <sup>1</sup>H NMR (600 MHz, Deuterium Oxide) δ 5.20 (d, J = 3.6 Hz, 1H, H<sub>1</sub>B<sub>major</sub>), 4.62 (d, J = 8.5 Hz, 0.19H, H<sub>1</sub>B<sub>minor</sub>), 4.58 – 4.48 (m, 2.12H, H<sub>1</sub>A<sub>major/minor</sub>, CH-propionic<sub>major</sub>), 4.42 (q, J = 6.6 Hz, 0.14H, CH-propionic<sub>minor</sub>), 4.29 (td, J = 21.8, 19.2, 11.8 Hz, 3.10H, CH-alanine<sub>major/minor</sub>, CH-D-isoglu<sub>major/minor</sub>), 3.92 (d, J = 12.3 Hz, 1.8H, H<sub>6</sub>A'<sub>major/minor</sub>), 3.85 (q, J = 7.9 Hz, 3H, H<sub>3</sub>B<sub>major</sub>, H<sub>4</sub>B<sub>minor</sub>), 3.82 – 3.78 (m, 2H, H<sub>2</sub>B<sub>major</sub>, H<sub>6</sub>B'<sub>major/minor</sub>), 3.76 – 3.65 (m, 8H, H<sub>2</sub>A<sub>major/minor</sub>, H<sub>4</sub>B<sub>major</sub>, H<sub>6</sub>B'<sub>major/minor</sub>, H<sub>6</sub>A'<sub>major/minor</sub>, H<sub>2</sub>B<sub>minor</sub>), 3.55 (td, J = 18.8, 17.8, 8.8 Hz, 2H, H<sub>3</sub>A<sub>major/minor</sub>, H<sub>3</sub>B<sub>minor</sub>), 3.43 – 3.37 (m, 4H, H<sub>4</sub>A<sub>major/minor</sub>, H<sub>5</sub>A<sub>major/minor</sub>, H<sub>5</sub>B<sub>major/minor</sub>), 2.33 – 2.20 (m, 4H, CH<sub>2</sub>-D-isoglutamine), 2.1 (m, 1.3H, CH<sub>2</sub>'-D-isoglutamine) 2.03 (s, 4H, NH-Acetate<sub>major/minor</sub>), 1.99 – 1.88 (m, 7H, NH-Acetate<sub>major/minor</sub>, CH<sub>2</sub>'-D-isoglutamine), 1.42 (dd, J = 7.3, 2.0 Hz, 5H, CH<sub>3</sub>-Alanine<sub>major/minor</sub>), 1.37 (dt, J = 10.3, 6.0 Hz, 5H, CH<sub>3</sub>-Propionic<sub>major/minor</sub>). <sup>13</sup>C NMR (151 MHz, D<sub>2</sub>O) δ 178.46 (carbonyl), 175.62 (carbonyl), 174.75 (carbonyl), 174.61 (carbonyl), 174.22 (carbonyl), 100.50 (C<sub>1</sub>A<sub>major/minor</sub>), 95.19 (C<sub>1</sub>B<sub>minor</sub>), 90.38(C<sub>1</sub>B<sub>major</sub>), 78.0 (CH-Propionic<sub>major/minor</sub>), 76.56 (C<sub>4</sub>B<sub>major</sub>), 76.18 (C<sub>5</sub>A<sub>major/minor</sub>), 75.56(C<sub>5</sub>B<sub>minor</sub>), 75.32(C<sub>4</sub>B<sub>minor</sub>), 73.69(C<sub>3</sub>A<sub>major/minor</sub>), 71.21 (C<sub>3</sub>B<sub>major</sub>), 70.43 (C<sub>4</sub>A<sub>major/minor</sub>), 61.26 (C<sub>6</sub>A<sub>major/minor</sub>), 61.23 (C<sub>3</sub>B<sub>minor</sub>?), 60.11 (C<sub>6</sub>B<sub>minor</sub>), 59.91 (C<sub>6</sub>B<sub>major</sub>), 56.20 (C<sub>2</sub>A<sub>major</sub>), 56.13 (C<sub>2</sub>A<sub>minor</sub>), 55.80 (C<sub>2</sub>B<sub>minor</sub>), 53.73 (C<sub>2</sub>B<sub>major</sub>), 50.06 (CH-Ala<sub>major/minor</sub>), 49.84 (CH-D-isoglutamine<sub>major/minor</sub>), 31.74 (CH<sub>2</sub>-D-isoglutamine<sub>major/minor</sub>), 28.06 (CH<sub>2</sub>-D-isoglutamine<sub>major/minor</sub>), 22.4 (NH-Acetates-CH<sub>3</sub><sub>major/minor</sub>), 18.30 (CH<sub>3</sub>-propionic<sub>major/minor</sub>), 17.07 (CH<sub>3</sub>-alanine<sub>major/minor</sub>). HRMS m/z: [M+H]<sup>+</sup> calcd C<sub>27</sub>H<sub>46</sub>N<sub>5</sub>O<sub>16</sub><sup>+</sup> 696.29341; Found 696.29087.

***(2R,3S,4R,5R,6S)-5-acetamido-6-(((2R,3S,4R,5R,6S)-5-acetamido-6-(benzyloxy)-4-(((9S,14R,17S,20R)-9-((benzyloxy)carbonyl)-14-carbamoyl-17-methyl-3,11,16,19-tetraoxo-1-phenyl-2-oxa-4,10,15,18-tetraazahenicosan-20-yl)oxy)-2-(hydroxymethyl)tetrahydro-2H-pyran-3-yl)oxy)-2-(acetoxymethyl)tetrahydro-2H-pyran-3,4-diyl diacetate (Compound 12):***

Compound **10**<sup>l2l</sup> (0.086 g, 0.093 mmol, 1eq) was dissolved in 2.16 mL of anhydrous THF. Then 0.4 mL of 1M TBAF in THF was added. After 3 hours, the reaction was stopped and condensed. The residue was then dissolved in 10% MeOH/EtOAc the organic layer was then washed 2x 1N HCl (water layer was checked for any residual product), dried and condensed and directly used in next reaction. The dry product was dissolved in 1.0 mL of DMF. D-isoglu-L-Lys(Z)-OBzl (0.072 g, 0.11 mmol, 1.2 eq), HOBt (0.015 g, 0.11 mmol, 1.2 eq), and HBTU (0.042 g, 0.11 mmol, 1.2 eq) was added at 0°C. After 15min, DIPEA (0.064 mL, 0.371 mmol, 4.0 eq) was added then the reaction was brought to room temperature until complete. After 4 hours, the reaction was stopped and condensed. The residue was then dissolved in 10%MeOH/EtOAc and washed with 1N HCl, saturated bicarbonate and brine (water layer was checked for product). The organic layer was dried and condensed. The crude was then purified via column chromatography 0-7% MeOH in DCM (major product (-acetate)= 52 mg, 44%; minor product (no-deacetylation)= 17 mg, 14%. Total yield= 58% over two steps). Note: during reactions one acetate was deprotected and assigned as the major product. Major product NMR assignment (we note slight impurity of dipeptide): <sup>1</sup>H NMR (600 MHz, DMSO-d<sub>6</sub>) δ 8.44 (d, J = 6.1 Hz, 1H, NH), 8.38 (d, J = 7.2 Hz, 1H, NH), 8.24 (t, J = 8.0 Hz, 3H, NH), 8.08 (d, J = 8.8 Hz, 1H, NH), 8.02 (d, J = 7.1 Hz, 1H, NH), 7.70 (s, 1H, NH), 7.66 (s, 1H, NH), 7.40 – 7.23 (m, 35H, Benzyl Protons), 7.21 (q, J = 5.7 Hz, 3H), 7.02 (d, J = 8.4 Hz, 1H, NH), 5.27 (dd, J = 12.0, 7.9 Hz, 1H, H<sub>3</sub>A), 5.12 – 5.06 (m, 2H, Benzylester CH<sub>2</sub>), 5.00 (s, 2H, CBz CH<sub>2</sub>), 4.92 (d, 1H, H<sub>1</sub>B), 4.89 (t, 1H, H<sub>4</sub>A), 4.79 (d, J = 8.2 Hz, 1H, H<sub>1</sub>A), 4.67 (q, J = 7.9, 6.9 Hz, 1H, C6-OH), 4.61 (t, J = 11.2 Hz, 1H, CH<sub>2</sub>OBn'), 4.50 – 4.36 (m, 3H, CH<sub>2</sub>OBn'', CH-ala, CH-prop), 4.28 – 4.16 (m, 6H, H<sub>6</sub>A, CH-lys), 4.01 – 3.92 (m, 2H, H<sub>6</sub>A'', CH-D-isogln), 3.75 (t, J = 9.5 Hz, 2H, H<sub>4</sub>B, H<sub>5</sub>A), 3.68 (q, J = 9.0 Hz, 2H, H<sub>2</sub>A, H<sub>6</sub>B'), 3.63 – 3.51 (m, 2H, H<sub>2</sub>B, H<sub>6</sub>B''), 3.48 – 3.37 (m, 2H, H<sub>3</sub>B, H<sub>5</sub>B), 3.00 – 2.92 (m, 13H, ε-CH<sub>2</sub>-Lys), 2.31 (t, J = 7.6 Hz, 2H, CH<sub>2</sub>-D-isogln), 2.19 – 2.13 (m, 3H, CH<sub>2</sub>-D-isogln'), 1.95 (d, J = 5.1 Hz, 8H, Acetate-CH<sub>3</sub>x2, CH<sub>2</sub>-D-isolgn''), 1.91 (s, 4H, Acetate-CH<sub>3</sub>), 1.85 – 1.77 (m, 4H, Acetate-CH<sub>3</sub>), 1.75 (d, J = 3.3 Hz, 3H, Acetate-CH<sub>3</sub>), 1.69 (tt, J = 13.4, 7.2 Hz, 1H, β-CH<sub>2</sub>-Lys'), 1.60 (dt, J = 14.2, 7.6 Hz, 2H, β-CH<sub>2</sub>-Lys''), 1.37 (qd, J = 11.7, 9.8, 5.9 Hz, 6H, δ-CH<sub>2</sub>-Lys), 1.27 (d, J = 6.7 Hz, 6H, CH<sub>3</sub>-propionic, γ-CH<sub>2</sub>-Lys), 1.22 (d, J = 6.9 Hz, 4H, CH<sub>3</sub>-Ala). <sup>13</sup>C NMR (151 MHz, DMSO) δ 174.16 (carbonyl), 173.54 (carbonyl), 172.66 (carbonyl), 172.58 (carbonyl), 172.50 (carbonyl), 172.36(carbonyl), 172.34 (carbonyl), 170.55 (carbonyl), 170.00 (carbonyl), 169.98 (carbonyl), 169.93 (carbonyl), 169.77 (carbonyl), 161.80 (carbonyl), 156.56(carbonyl), 156.54 (carbonyl), 138.13 (aromatic), 137.74 (aromatic), 137.72 (aromatic), 136.48 (aromatic), 136.43 (aromatic), 128.90 (aromatic), 128.88 (aromatic), 128.81 (aromatic), 128.80 (aromatic), 128.72 (aromatic), 128.68 (aromatic), 128.52 (aromatic), 128.46 (aromatic), 128.23 (aromatic), 128.20 (aromatic), 128.17 (aromatic), 127.93 (aromatic), 127.88 (aromatic), 99.70 (C<sub>1</sub>A), 95.98 (C<sub>1</sub>B), 76.39 (CH-Propionic), 76.29 (C<sub>4</sub>B), 75.76 (C<sub>3</sub>B), 72.67 (C<sub>3</sub>A), 72.19 (C<sub>5</sub>B), 70.72 (C<sub>5</sub>A), 69.01 (C<sub>4</sub>A), 68.71 (CH<sub>2</sub>OBn), 66.32 (Benzylester-CH<sub>2</sub>), 65.59 (CBz-CH<sub>2</sub>), 62.22 (C<sub>6</sub>A), 59.56 (C<sub>6</sub>B), 57.41 (CH-D-isolgn), 54.73 (C<sub>2</sub>A), 54.24 (C<sub>2</sub>B), 52.6 (CH-Lys), 48.51 (CH-Ala), 31.95 (CH<sub>2</sub>-D-isolgn''), 31.16 (CH<sub>2</sub>-D-isolgn'), 30.92 (CH<sub>2</sub>-β-Lys), 30.89 (CH<sub>2</sub>-δ-Lys), 28.37 (residual dipeptide amine), 28.04 (residual dipeptide amine), 23.14(Acetate-CH<sub>3</sub>, CH<sub>2</sub>-γ-Lys), 23.07(Acetate-CH<sub>3</sub>), 20.89(Acetate-CH<sub>3</sub>), 20.84(Acetate-CH<sub>3</sub>),



20.78 (Acetate-CH<sub>3</sub>), 19.43 (CH<sub>3</sub>-Prop), 19.28 (CH<sub>3</sub>-Ala). Major product (-OAc). HRMS m/z: [M+H-OAc]<sup>+</sup> calcd C<sub>61</sub>H<sub>82</sub>O<sub>22</sub>N<sub>7</sub><sup>+</sup> 1264.55074; Found 1264.55087.

**(S)-2-((R)-4-((S)-2-((R)-2-(((3R,4R,5S,6R)-3-acetamido-5-((2S,3R,4R,5S,6R)-3-acetamido-4,5-dihydroxy-6-(hydroxymethyl)tetrahydro-2H-pyran-2-yl)oxy)-2-hydroxy-6-(hydroxymethyl)tetrahydro-2H-pyran-4-yl)oxy)propanamido)propanamido)-5-amino-5-oxopentanamido)-6-aminohexanoic acid (Compound 3):** Mono-deacetylated compound **12** (0.017 g, 0.013 mmol, 1 eq) was dissolved in 0.65 mL of acetonitrile and 0.65 mL of 0.1M LiOH (aq). The reaction was complete in 2 hours and AcOH was added to stop the reaction (monitored with pH paper to ~7), filtered and condensed (Mass spec, M+23= 1070, de-acetylated and de-benzyl ester intermediate). The dry product was dissolved in 0.3 mL of THF, 0.1 mL of acetic acid and 1 mL of water. 20% Pd(OH)<sub>2</sub> (5 mg, 0.0065 mmol, 0.5 eq) was added and the flask was evacuated three times and filled with hydrogen. After 20 hours, reaction was gaged as incomplete and another portion of 20% Pd(OH)<sub>2</sub> (5 mg, 0.0065 mmol, 0.5 eq) was added. After 8 hours, reaction was still not done and an additional 20% Pd(OH)<sub>2</sub> (5 mg, 0.0065 mmol, 0.5 eq) was added. The reaction was left overnight. The reaction was then filtered and condensed. The crude product was purified by reverse-phase chromatography using an SunFire Prep C18 (0-7% acetonitrile in water with 0.1% formic acid over 4 minutes at 20mL/min) to yield as white solid (4.1 mg, 37%). α:β ratio ratio 1:0.5 for Carbohydrate B anomeric center. α isomer is designated as major isomer, β is designated as minor isomer. NMR assignments based on 2D experiments (α major isomer was predominately assigned). <sup>1</sup>H NMR (600 MHz, Deuterium Oxide) δ 5.20 (d, *J* = 3.4 Hz, 1H, H<sub>1B</sub>major), 4.60 (d, *J* = 8.4 Hz, 0.5H, H<sub>1B</sub>minor), 4.50 (dt, *J* = 9.5, 7.3 Hz, 2H, H<sub>1A</sub>, CH-Prop<sub>major</sub>), 4.42 – 4.32 (m, 2H, CH-D-iso, CH-Prop<sub>minor</sub>), 4.27 (q, *J* = 7.5 Hz, 2H, CH-Ala<sub>major/minor</sub>), 4.12 (dd, *J* = 8.3, 5.2 Hz, 1H, CH-Lys<sub>major/minor</sub>), 3.93 – 3.87 (m, 1H, C<sub>6A</sub>'<sub>major</sub>), 3.87 – 3.76 (m, 4H, H<sub>2B</sub>major, H<sub>4B</sub>major, H<sub>5B</sub>major, H<sub>6B</sub>'<sub>major</sub>), 3.76 – 3.64 (m, 4H, C<sub>6A</sub>''<sub>major</sub>, C<sub>2A</sub>major, C<sub>3B</sub>major, C<sub>6B</sub>major), 3.60 – 3.48 (m, 1H, H<sub>5A</sub>major), 3.38 (q, *J* = 8.7, 7.3 Hz, 3H, H<sub>4A</sub>major, H<sub>5A</sub>major), 2.95 (t, *J* = 7.5 Hz, 2H, Lys-CH<sub>2</sub>ε<sub>major/minor</sub>), 2.36 (td, *J* = 7.8, 2.7 Hz, 2H, D-isogln-CH<sub>2</sub>γ<sub>major/minor</sub>), 2.17 – 2.08 (m, 1H, D-isogln-CH<sub>2</sub>β<sub>major/minor</sub>), 2.01 (s, 3, Acetate-CH<sub>3</sub>-A<sub>major/minor</sub>), 2.00 – 1.95 (m, 1H D-isogln-CH<sub>2</sub>β<sub>major/minor</sub>), 1.92 (d, *J* = 10.6 Hz, 3H, Aceate-CH<sub>3</sub>-B<sub>major/minor</sub>), 1.77 (tt, *J* = 13.5, 7.1 Hz, 1H, Lys-CH<sub>2</sub>β<sub>major/minor</sub>), 1.64 (qd, *J* = 12.3, 9.9, 6.8 Hz, 3H, , Lys-CH<sub>2</sub>γ<sub>major/minor</sub>, Lys-CH<sub>2</sub>β<sub>major/minor</sub>), 1.42 – 1.31 (m, 8H, CH<sub>3</sub>-Ala<sub>major/minor</sub>, CH<sub>3</sub>-Prop<sub>major/minor</sub>, Lys-CH<sub>2</sub>δ<sub>major/minor</sub>). <sup>13</sup>C NMR (101 MHz, D<sub>2</sub>O) δ 178.92 (Carbonyl), 175.93 (Carbonyl), 175.53 (Carbonyl), 175.10 (Carbonyl), 175.00 (Carbonyl), 174.91 (Carbonyl), 174.60 (Carbonyl), 174.39 (Carbonyl), 174.19 (Carbonyl), 174.13 (Carbonyl), 174.03 (Carbonyl), 100.38 (C<sub>1A</sub>major), 99.98 (C<sub>1A</sub>minor), 94.99 (C<sub>1B</sub>minor), 90.14 (C<sub>1B</sub>major), 79.24 (minor?), 77.92 (CH-Propionic<sub>minor</sub>), 77.40 (CH-Propionic<sub>major</sub>), 76.13 (C<sub>3B</sub>major), 76.01 (C<sub>5A</sub>major), 75.38 (C<sub>4B</sub>major), 75.08 (minor?), 73.43 (C<sub>3A</sub>major), 70.92 (C<sub>5B</sub>major), 70.12 (C<sub>4A</sub>major), 61.39 (C<sub>6A</sub>major), 59.80 (C<sub>6B</sub>major), 59.62 (minor?), 55.89 (C<sub>2A</sub>major), 54.86 (CH-Lys<sub>major</sub>), 53.53 (C<sub>2B</sub>major), 52.87 (CH-D-isogln<sub>major</sub>), 49.87 (CH-ala<sub>major</sub>), 49.66 (CH-ala<sub>minor</sub>), 39.12 (CH<sub>2</sub>-Lysε<sub>major</sub>), 31.83 (CH<sub>2</sub>-D-isoglnγ<sub>major</sub>), 30.90 (CH<sub>2</sub>-Lysβ<sub>major</sub>), 27.09 (CH<sub>2</sub>-D-isoglnβ<sub>major</sub>), 26.25 (CH<sub>2</sub>-δ-Lys<sub>major</sub>), 22.21 (Acetate-CH<sub>3</sub>minor), 22.07 (Acetate-CH<sub>3</sub>major), 21.99 (Acetate-CH<sub>3</sub>major), 21.96 (CH<sub>2</sub>-Lysγ<sub>major</sub>), 18.06 (CH<sub>3</sub>-Prop<sub>major</sub>), 17.86 (CH<sub>3</sub>-Prop<sub>minor</sub>), 16.64 (CH<sub>3</sub>-Ala<sub>minor</sub>), 16.55 (CH<sub>3</sub>-Ala<sub>major</sub>). HRMS m/z: [M+H]<sup>+</sup> calcd C<sub>33</sub>H<sub>58</sub>O<sub>17</sub>N<sub>7</sub><sup>+</sup> 824.38837; Found 824.38872.

### **III. Bone Marrow Derived Macrophages culture and treatment**

#### ***Figure 3, Figure 4, SI-Figure 2, SI-Figure 3 and SI-Figure 4 Conditions***

Bone marrow-derived macrophages (BMDMs) cells were generated by flushing bone marrow cells from femurs and tibia of C57BL/6J male mice, depleting red blood cells using ACK lysis buffer, and resuspending cell in complete DMEM media supplemented with 10% FBS, 0.5% penicillin/streptomycin mixture, and 20 ng/mL of M-CSF. Cells were maintained in culture at 37 °C, 5% CO<sub>2</sub> for 6 days before experimentation. An average of 2 x 10<sup>5</sup> BMDM were seeded in 24 well plate and cultured overnight in complete media without M-CSF. BMDMs were stimulated in the same media without M-CSF and containing 20 μM of designated compound dissolved in water. Water was added to media as control treatment. All treatments were not toxic and resulted to no cell death. We also note after observation with optical microscope that the treatment with all compounds resulted in macrophages with identical morphology.

#### ***Figure 5 Conditions***

Bone marrow-derived macrophages (BMDMs) were generated by flushing bone marrow cells from femurs and tibia of C57BL/6J male mice, depleting red blood cells using ACK lysis buffer, and resuspending cells in complete DMEM high glucose media supplemented with 10% FBS, 1.0 % penicillin/streptomycin mixture, L-Glutamine, Na-Pyruvate, and 20 ng/mL of M-CSF. Cells were maintained in culture at 37 °C, 5% CO<sub>2</sub> for 6 days before experimentation. An average of 1 x 10<sup>6</sup> BMDM were seeded in 12 well plate and cultured overnight in 1 mL of complete media without M-CSF. BMDMs were stimulated in the same media and containing 0 μM, 20 μM, or 100 μM of designated compound dissolved in water. Water was added to media in control treatment. Three independent experiments with BMDMs were carried out.

Note: Multiple macrophage isolations were performed throughout the manuscript. Additionally, GMTP was synthesized on several occasions, and thus multiple batches were used throughout the replicates of this manuscript.

### **IV. Real-time quantitative-PCR**

All experiments were performed with proper PPE (goggles, lab coat and surgical mask). RNase AWAY was used each time to decontaminate surfaces, as well as instruments for RNA isolation, cDNA synthesis, as well as qRT-PCR.

#### ***Materials and methods for Figure 3, SI-Figure 2 and SI-Figure 3***

##### **RNA isolation.**

Total RNA from BMDMs was isolated using RNeasy Mini isolation kit (Qiagen) following the Qiagen Protocol (Part 1 and Part 2) using Ultrapure DNase and RNase Free water. The recommended-on column DNase digestion was performed during the isolation using RNase-Free DNase Set (Qiagen). Total RNA concentrations were determined using a nanodrop (Thermo Scientific).

##### **cDNA synthesis.**

cDNA synthesis was performed using a QuantiTect Reverse Transcription Kit (Qiagen). RNA was normalized prior to cDNA synthesis. Final concentrations of cDNA were determined, as well as 260/280 and 260/230 ratio, using a nanodrop (Thermo Scientific).

### **qRT-PCR and Primers.**

Real-time PCR was performed in a 96-W plate (Multiplate™ Low-Profile 96-Well Unskirted PCR Plates #MLL9601 BIORAD) using a 7300 Applied Biosystems RT-PCR with SsoAdvanced Universal SYBR green Supermix (Bio-Rad).

PCR was performed with a reaction volume of 10  $\mu$ L consisting of 0.3  $\mu$ L each of F and R primer (10 $\mu$ M), 1  $\mu$ L of cDNA (1:4 dilution), 5  $\mu$ L of Sybr Green (Bio-Rad), and 3.4  $\mu$ L of RNase/DNase Water. Each sample was repeated in duplicate for the PCR as a technical replicate. The thermal cycle was programmed for stage 1: 3 minutes at 95°C; stage 2: followed by 40 cycles of 15 seconds at 95°C and 45 seconds at 60°C; stage 3: 10 seconds at 95°C; stage 4: 10 seconds at 55°C and 10 seconds at 95°C.

Relative gene expression was determined utilizing the  $2^{-\Delta\Delta C_t}$  method. Each compound treatment measurement in cells was normalized to the expression of the housekeeping gene 18s. Data was analyzed with GraphPad Prism 8 using an unpaired parametric t-test with equal SD two-tailed: \*  $P \leq 0.05$ , \*\* $P \leq 0.01$ , \*\*\* $P \leq 0.001$ , and \*\*\*\* $P \leq 0.0001$ .

All primers were obtained from Eurofins Genomics LLC. A stock concentration of 100 $\mu$ M was made for each primer in RNase and DNase free water and stored at -80°C. From the 100 $\mu$ M stocks, 10 $\mu$ M aliquots were made and stored at -20°C for short term use.

***Cox2*\_For:** CGAGTCGTTCTGCCAATAGAA  
***Cox2*\_Rev:** CCTGGTCGGTTTGATGTTACT  
***Il-1 $\beta$* \_For:** GCAACTGTTCTGAACTCAACT  
***Il-1 $\beta$* \_Rev:** ATCTTTTGGGGTCCGTCAACT  
***Oasl1\_1*\_For:** GTGCTCAAGGTAAGGTAG  
***Oasl1\_1*\_Rev:** CTGTGGAAACAGCTCAGGAA  
***m18s*\_For:** GTAACCCGTTGAACCCATT  
***m18s*\_Rev:** CCATCCAATCGGTAGTAGCG  
***tnf $\alpha$* \_For:** CAGGCGGTGCCTATGTCTC  
***tnf $\alpha$* \_Rev:** CGATCACCCCGAAGTTCAGTAG  
***Cxcl10*\_For:** CCAAGTGCTGCCGTCATTTTC  
***Cxcl10*\_Rev:** GGCTCGCAGGGATGATTTCAA

### ***Materials and methods for Figure 5***

#### **RNA isolation.**

Total RNA from BMDMs was isolated using RNeasy plus Mini kit (Qiagen) following the Qiagen Protocol (Part 1 and Part 2) using Ultrapure DNASE and RNASE Free water. 0.36 ml lysis buffer RLT Plus containing DTT and beta-mercaptoethanol were added to each well in 12 well plate. Genomic DNA Eliminator spin columns were used to remove DNA. Total RNA

concentrations were determined using a nanodrop (Thermo Scientific) and 260/280 ratio in all samples were in 2.0-2.20.

### **cDNA synthesis.**

cDNA synthesis was performed using a QuantiTect Reverse Transcription Kit (Qiagen). RNA was normalized prior to cDNA synthesis. 100ng of total RNA in each sample were reversed into cDNA, further eliminated genomic DNA before first strand cDNA were synthesized. Final concentrations of cDNA were determined, as well as 260/280 and 260/230 ratio, using a nanodrop (Thermo Scientific).

### **qRT-PCR and Primers.**

Real-time PCR was performed in a Hard-Shell 384-Well PCR Plates #HSP-3801, BIORAD) using a CFX386 Real-Time System (Bio-Rad) with SsoAdvanced Universal SYBR green Supermix (Bio-Rad).

PCR was performed with a reaction volume of 10  $\mu$ L consisting of 0.25  $\mu$ L each of F and R primer (10 $\mu$ M), 0.5  $\mu$ L of cDNA (1:2 dilution), 5  $\mu$ L of Sybr Green (Bio-Rad), and 4.0  $\mu$ L of RNase/DNase Water. Each sample was repeated in duplicate for the PCR as a technical replicate. The thermal cycle was programmed for stage 1: 1 minutes at 95°C; stage 2: followed by 40 cycles of 5 seconds at 95°C and 30 seconds at 62°C; stage 3: 10 seconds at 95°C; stage 4: 10 seconds at 55°C and 10 seconds at 95°C.

Relative gene expression was determined utilizing the  $2^{(-\Delta\Delta C_t)}$  method. Each compound treatment measurement in cells was normalized to the expression of the housekeeping gene GAPDH and  $2^{(-\Delta\Delta C_t)}$  values in control group set as 1. Data was analyzed with GraphPad Prism 9 using a one way Anova and ordinary Anova Test: \*  $P \leq 0.05$ , \*\*  $P \leq 0.01$ , \*\*\*  $P \leq 0.001$ , and \*\*\*\*  $P \leq 0.0001$ .

All primers were obtained from IDT company. A stock concentration of 100 $\mu$ M was made for each primer in RNase and DNase free water and stored at -80°C. From the 100 $\mu$ M stocks, 10 $\mu$ M aliquots were made and stored at -20°C for short term use.

***IL6\_For***: CTTCAACAAGTCGGAGGCTTAAT;

***IL6\_Rev***: ACTCCAGGTAGCTATGGTACTC;

***Acod1\_For***: GGTGAGAGAGTTGCTCAAGAAG;

***Acod1\_Rev***: CGAATGAGGACATGCTGGATAG;

***Cxcl9\_For***: TTCCTCTTGGGCATCATCTTC;

***Cxcl9\_Rev***: GCAGGTTTGATCTCCGTTCT;

***Lcn2\_For***: GCCAGTTCCTCTGGGAAATA;

***Lcn2\_Rev***: AGATGATGTTGTCGTCCTTGAG;

***Isg15\_For***: GAAGCAGATTGCCCAAGAAG;

***Isg15\_Rev***: CTACAGTCTGCGTCAGAAAGAC;

## PG library and results for qRT-PCR initial screen.

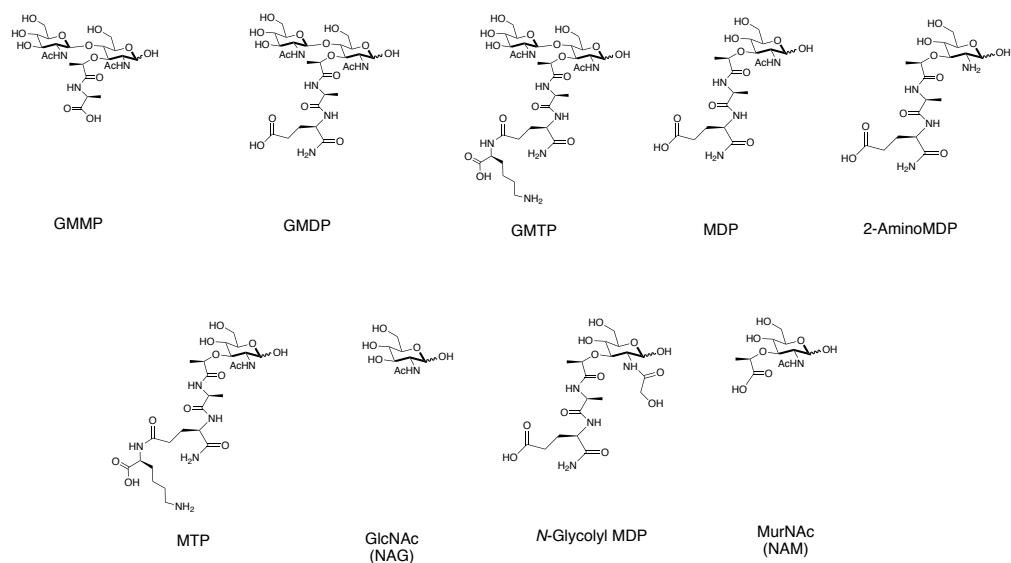

**SI-Figure 1:** Structures of PG synthetic fragments tested in qRT-PCR assay. Compounds MDP (sigma-aldrich), GlcNAc (sigma-aldrich), *N*-glycolyl (ng-MDP) (invivogen), and MurNAc (sigma-aldrich) were purchased commercially. Compounds MTP and 2-Amino MDP were synthesized prior in our lab<sup>[1]</sup>. GMMP, GMDP, GMTP were synthesized and reported above.

## qRTPCR results for initial screen

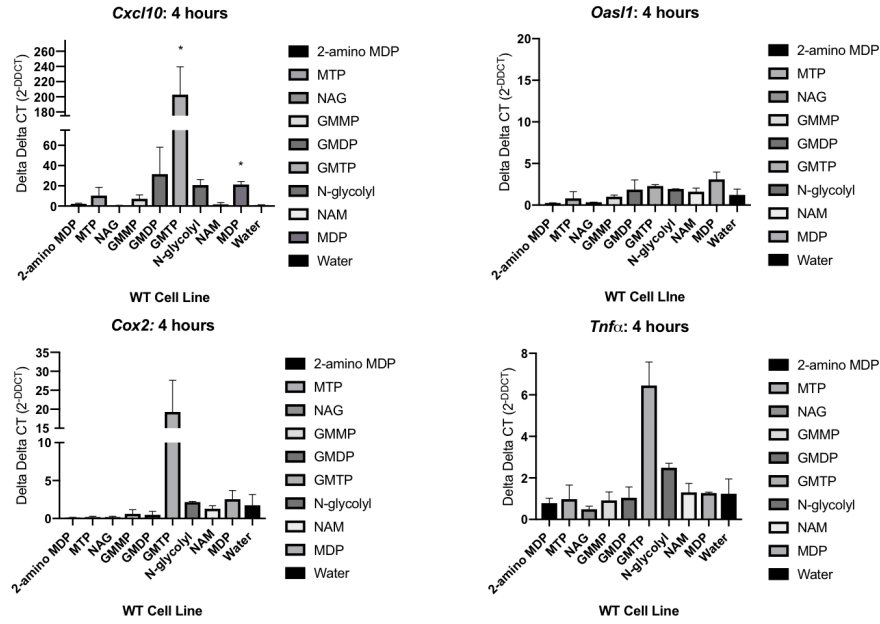

**SI-Figure 2:** qRTPCR cytokine screen of BMDMs treated with all PG fragments at 20  $\mu$ M for 4 hours. Each compound was tested in biological duplicate with two technical replicates. Data was analyzed with GraphPad Prism 8. Error bars are reported as  $\pm$ SEM. An un-paired t-test was performed \*  $P \leq 0.05$ , \*\*  $P \leq 0.01$ , \*\*\*  $P \leq 0.001$ , and \*\*\*\*  $P \leq 0.0001$ . We note compounds were only performed in biological duplicate as an initial “hit” screen and can skew the statistical analysis.

### qRT-PCR GMTP vs. MDP 4-hour repeat.

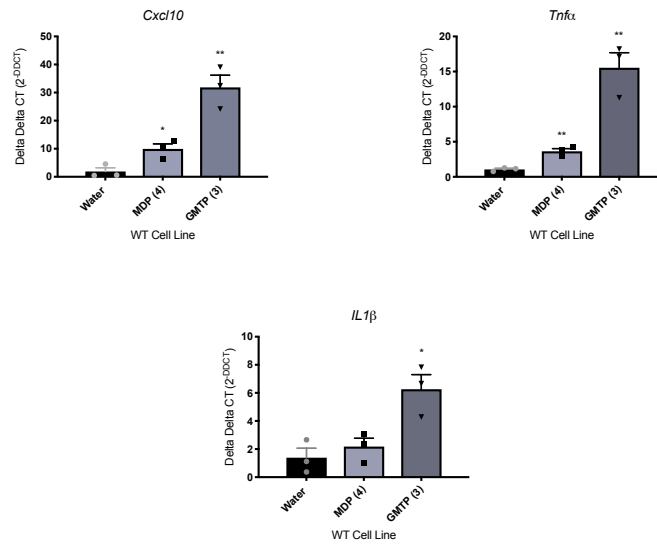

**SI-Figure 3:** Repeat in biological triplicate of BMDMs treated with 20μM of water, GMTP or MDP for 4 hours. Each compound/cytokine was tested via qRT-PCR in two technical replicates. Data was analyzed with GraphPad Prism 8 using an unpaired parametric t-test with equal SD two-tailed: \* P ≤ 0.05, \*\* P ≤ 0.01, \*\*\* P ≤ 0.001, and \*\*\*\* P ≤ 0.0001. Error bars are reported as SEM.

### qRT-PCR Numerical $\Delta\Delta$ CT Data for Main Text Figure 3.

SI- Table 1: Individual replicate  $\Delta\Delta$ CT for main Figure 3.

|               | Water   |          |           | MDP (4)  |          |          | N-glycolyl (ng-MDP) (5) |          |         | GMTP (3) |          |          |
|---------------|---------|----------|-----------|----------|----------|----------|-------------------------|----------|---------|----------|----------|----------|
| <i>Cxcl10</i> | 1.00000 | 1.06437  | 1.580083  | 13.45434 | 13.08643 | 6.916298 | 16.33619                | 18.89588 | 10.9283 | 20.9663  | 28.44297 | 27.66519 |
| <i>Tnfa</i>   | 1.00000 | 1.166036 | 1.149521  | 2.892073 | 3.596983 | 3.304033 | 7.298441                | 5.776048 | 5.43299 | 15.06217 | 13.86763 | 13.62145 |
| <i>Il1b</i>   | 1.00000 | 1.027679 | 1.181854  | 1.013861 | 1.087266 | 0.924596 | 4.224797                | 2.655366 | 2.70344 | 5.110092 | 3.927083 | 4.472197 |
| <i>Cox2</i>   | 1.00000 | 1.043447 | 0.9427442 | 1.126976 | 1.157696 | 0.972567 | 3.788574                | 2.910659 | 2.67579 | 4.787842 | 4.500955 | 4.063975 |

## V. RNA sequencing

### RNAseq protocols.

BMDMs were generated from three C57BL/6 WT male mice (as indicated above in bone marrow treatment, Section III) and stimulated with 20  $\mu$ M of different PG fragments in biological triplicate. After 18h of treatment total RNA was isolated using RNeasy Micro kit (Qiagen). RNA libraries were synthesized using Perkin Elmer's NEXTflex rapid directional RNAseq library preparation kit according to manufacturer's standard protocol ([https://perkinelmer-appliedgenomics.com/wp-content/uploads/marketing/NEXTFLEX/RNA/5138-07\\_Rapid\\_Directional\\_RNA-Seq\\_Kit.pdf](https://perkinelmer-appliedgenomics.com/wp-content/uploads/marketing/NEXTFLEX/RNA/5138-07_Rapid_Directional_RNA-Seq_Kit.pdf)). The libraries were constructed on a Perkin Elmer Sciclone G3 NGS liquid handler. 310 ng of total RNA was used as input for all preparations. 15 PCR cycles were used for library amplification. Targeted sequencing depth was 30 million paired-end reads per sample performed in 3 biological replicates. Sequence data was generated on an Illumina NextSeq 550 system at the University of Delaware sequencing core.

### Data Analysis.

Ble2fastq2 Conversion software (Illumina) was used to generate de-multiplexed Fastq files. Expression values were normalized as Fragments per Kilobase Million reads after correction for gene length (FPKM) in Cuffdiff version 1.05 in the DNAnexus analysis pipeline and filtered for genes that exhibited a statistically significant difference ( $P < 0.01$ ) with an FDR threshold of 0.05 and a biologically relevant change log fold change  $> 1$ . Samples were analyzed in the RNA-sequencing pipeline of Seqmonk for mRNAs for opposing strand specific and paired end libraries with merged transcriptome isoforms, correction for DNA contamination and log transformed resulting expression values in  $\log_2$  FPKM. RNA sequencing data will be available at: <https://www.ncbi.nlm.nih.gov/geo/query/acc.cgi?acc=>.



## VI. Biochemical Assays

### **Luminex.**

Stored culture media samples (BMDMs treated with 20  $\mu$ M compound or water control for 18h, as described in Section III) were slowly thawed to room temperature and Luminex assay was performed at the University of Maryland, Baltimore Cytokine Core per manufacturer's instructions (Millipore):

A 96 well plate (Greiner) was wet with 200  $\mu$ l of Assay Buffer and placed on a shaker for 10 minutes. The plate is then decanted and 25  $\mu$ l of Assay Buffer or appropriate buffer was added to each well and 25  $\mu$ l of standard/sample/control was added to the appropriate wells. All samples were run in biological triplicate and technical duplicate. Then 25  $\mu$ l of a mixture containing designated cytokines (1:50 dilution) that were conjugated to beads was added. All plates contain a minimum high and low control in order to determine the validity of the plates. The plate was then placed on a shaker, at 4°C overnight.

The plate was then placed on a magnetic washer, 200  $\mu$ l of Wash Buffer was added to each well, the plate was set on a shaker at 500 rpm for 1 minute and repeated an additional two times. After the last decanting step 25 $\mu$ l of detection antibody was added and the plate was placed on a shaker for one hour at room temp. Then 25  $\mu$ l of Phycoerythrin (1:25 dilution) was added to each well and the plate was placed back on the shaker for 30 minutes. The plate was then washed three times and 150  $\mu$ l of Sheath Fluid was added to each well. The plate was then read using a Luminex MagPix reader. The data was then calculated using Luminex's exponent Software.

### **Western Blot Analysis.**

The following antibodies were used in this study: Rabbit antibodies against IRF5 obtained from Abcam (ab21689). Phospho-p65-NF $\kappa$ B (Ser536, 93H1), p65-NF $\kappa$ B (D14E12), STAT1 (D1K9Y) Phospho-STAT1 (Tyr701, 58D6). Mouse anti  $\beta$ -actin (8H10D10) were purchased from Cell Signaling Technology. The antibody against phospho-Ser445 IRF5 used at 1/2000 dilution was generated by immunizing rabbits with a synthetic peptide (IRLQIpS445NPDLG; NeoBiolab, MA. USA) and described<sup>[4]</sup>. Whole-cell extracts were obtained by harvesting BMDMs . BMDMs were prepped as stated in Section III but with special attention to FBS. In brief, cells were generated by flushing bone marrow cells from femurs and tibia of mice, depleting red blood cells using ACK lysis buffer, and resuspending cell in complete DMEM media supplemented with 10% FBS, 0.5% penicillin/streptomycin mixture, and 20 ng/mL of M-CSF. Cells were maintained in culture at 37 °C, 5% CO<sub>2</sub> for 6 days before experimentation. An average of 2 x 10<sup>5</sup> BMDM were seeded in 24 well plate and cultured overnight in complete media without M-CSF. Before stimulation BMDMs were starved (cultured without FBS) for 3-4 hours. BMDMs were stimulated in the same media + FBS without M-CSF

and containing 20 $\mu$ M of designated compound dissolved in water. Water was added to media as control treatment. All treatments were not toxic and resulted to no cell death. We noted as well after observation with optical microscope that the treatment with all compounds resulted to macrophages with identical morphology.

Whole-cell extracts were obtained by harvesting cells with lysis buffer (1% NP-40, 20 mM Tris-HCl (pH 7.4), 150 mM NaCl, 2 mM EDTA, 2 mM EGTA, 4 mM Na<sub>3</sub>VO<sub>4</sub>, and 40 mM NaF) containing protease and phosphatase inhibitors tablets (Roche). Western blotting was performed using standard protocols for SDS-PAGE and wet transfer onto PVDF membranes. Primary antibodies were diluted in blocking buffer (BSA 5%+1X TBST) and incubated overnight at 4 °C. Secondary anti mouse (NA931V, GE Healthcare) or rabbit (NA934V, GE Healthcare) HRP were used at 1/5000 and incubated for 1 at RT. The bands were visualized by enhanced chemiluminescence (Western Lightning Plus [PerkinElmer]) and exposed on film.

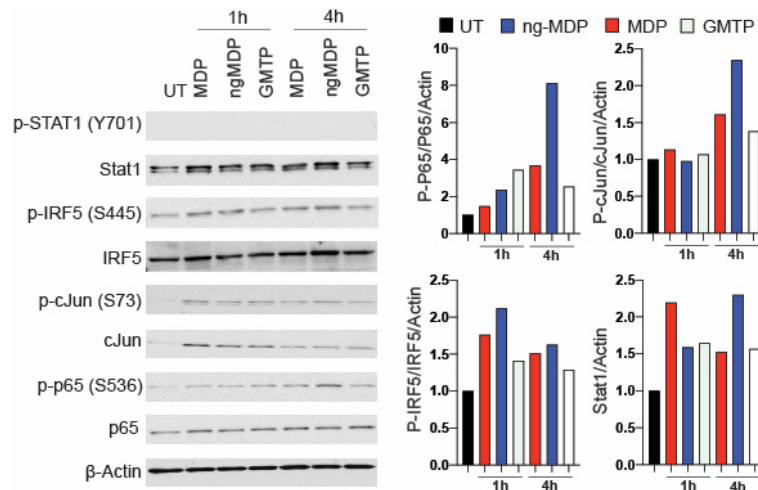

**SI-Figure 4:** Induction of Stat1, IRF5, cJun, and p65 NF $\kappa$ B phosphorylation in BMDMs with 20  $\mu$ M MDP, ng-MDP, GMTP and control (UT, water) isolated at 1 hour and 4 hours (N=1).

### IL6 assay with ELISA kit.

The Mouse IL-6 Uncoated ELISA kit (Cat#88-7064, Thermofisher) contains the necessary reagents, standards, buffers and diluents for performing quantitative enzyme linked immunosorbent assays (ELISA), 0.1 ml of supernatant from each sample (as prepped in section III) in duplicate were added to ELISA 96 well plate (Corning Costar 9018), the assay method and standard curve follows the company protocol. Data was analyzed with GraphPad Prism 9 using a one way Anova and ordinary Anova Test: \* P $\leq$ 0.05, \*\*P $\leq$ 0.01, \*\*\*P $\leq$ 0.001, and \*\*\*\*P $\leq$ 0.0001.

## VII. Peptidoglycan Enzymatic Degradation and Mass Spectrometry Analysis

### ***Lactobacillus acidophilus* growth and enzymatic degradation.**

*L. acidophilus* (Carolina Biological) was grown in an anaerobic environment in 95 mLs of Lactobacilli MRS Broth (10.0 g protease peptone #3, 10.0 g beef extract, 5.0 g yeast extract, 20.0 g dextrose, 1.0 g tween20, 2.0 g ammonium citrate, 5.0 g sodium acetate, 0.1 g magnesium sulfate, 0.05 g manganese sulfate, and 2.0 g dipotassium phosphate in 1L of water) for seven days at 37°C.

After seven days, the cells were pelleted in a 50 mL conical tube at 3000 g for 5 minutes. Cells were washed with 10 mL of PBS and pelleted at 3000 g for 5 min two times. The pellet was resuspended in 7.5 mL of lysis buffer (50 mM Tris pH 8.0, 25 mM NaCl, 2 mM EDTA). Lysozyme from Chicken Egg White (Sigma) at 0.4 mg/ml was added and placed in shaker at 37°C. Additional lysozyme was added twice a day for a total of six times over three days.

Digested samples were centrifuged for 30 s, and the supernatant was filtered through Amicon Ultra 3K Filter Devices. The filter was washed with water, and the resulting supernatants were combined and lyophilized to yield a clear oil (~75 mg).

### **LC-Mass Spectrometry Method.**

A LC/MS method previously established by our lab, Liang and DeMeester et al, was utilized for testing a highly concentrated solution of isolated PG<sup>[6]</sup>. The eluting peaks were subjected to high-resolution mass analysis on the Q-Exactive Orbitrap (Acquity UPLC BEH C18 column 2.1 × 50 mm (Waters) using a Dionex UHPLC coupled to a Q-Exactive Orbitrap (Thermo Fisher Scientific)). The LC method was a 0.5 ml min<sup>-1</sup> linear gradient starting from 0% A to 50% B in 4 min. Eluent A was 0.1% formic acid in water and Eluent B was 0.1% formic acid in acetonitrile. Thermo Xcalibur Qual Browser was used to process and analyze the data generated. All species showed the expected mass, correct m/z ratio within ±10p.p.m. and correct isotopic pattern. All masses observed were not observed in the four negative controls utilizing same LC/MS method: (1) MRS growth media (1:25 dilution in water for injection), (2) PBS supernatant of the first and second washes of cells pellet before lysis buffer was added (direct injection), and (3) lysis buffer (1:25 dilution in water for injection).

## Results and HRMS Spectra of Identified fragments.

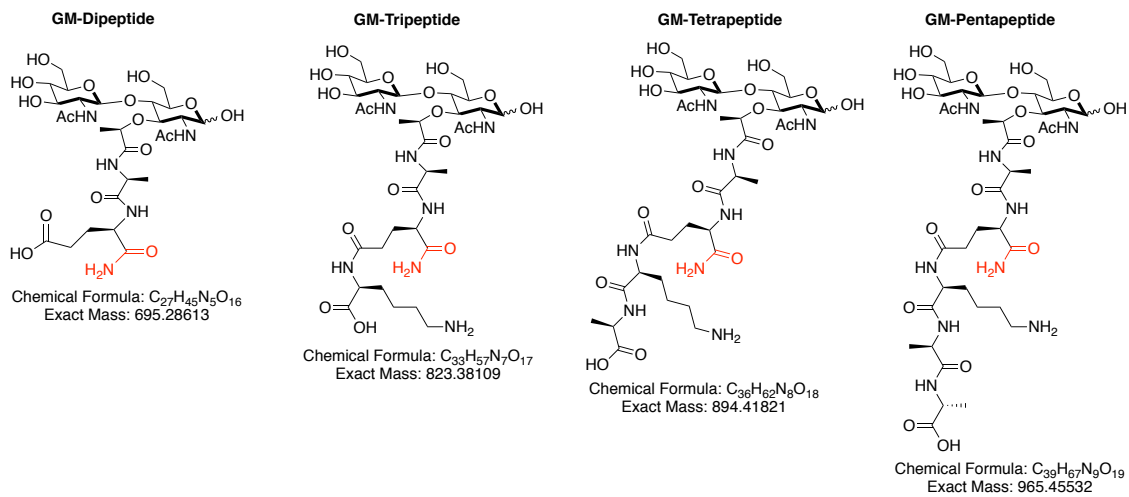

**SI-Table 2:** HRMS data obtained for each identified fragment along with its expected and observed mass. Repeated in three biological replicates (Observation/Replicate).

| Entry # | Fragment        | Exact Mass | Expected [M+H] | Observed [M+H] | ppm      | Retention Time (RT) | Ionization Intensity | Obs. /Rep. # |
|---------|-----------------|------------|----------------|----------------|----------|---------------------|----------------------|--------------|
| 1       | GM-Dipeptide    | 695.28613  | 696.29341      | 696.29378      | 0.54155  | 2.53-2.58           | 1.59E+07             | 3/3          |
| 2       | GM-Tripeptide   | 823.38109  | 824.38837      | 824.38770      | -0.81394 | 1.44-1.48           | 2.65E+08             | 3/3          |
| 3       | GM-Tetraptide   | 894.41821  | 895.42548      | 895.42461      | -0.97655 | 2.24-2.39           | 7.36E+07             | 3/3          |
| 4       | GM-Pentapeptide | 965.45532  | 966.46260      | 966.46363      | 1.06591  | 2.33-2.36           | 4.36E+06             | 3/3          |

## Compound GM-Dipeptide (Entry #1)

Grimes\_Kimberly\_LA2 #1213-1245 RT: 2.53-2.58 AV: 6 NL: 1.59E7  
T: FTMS + p ESI Full ms [250.0000-3000.0000]

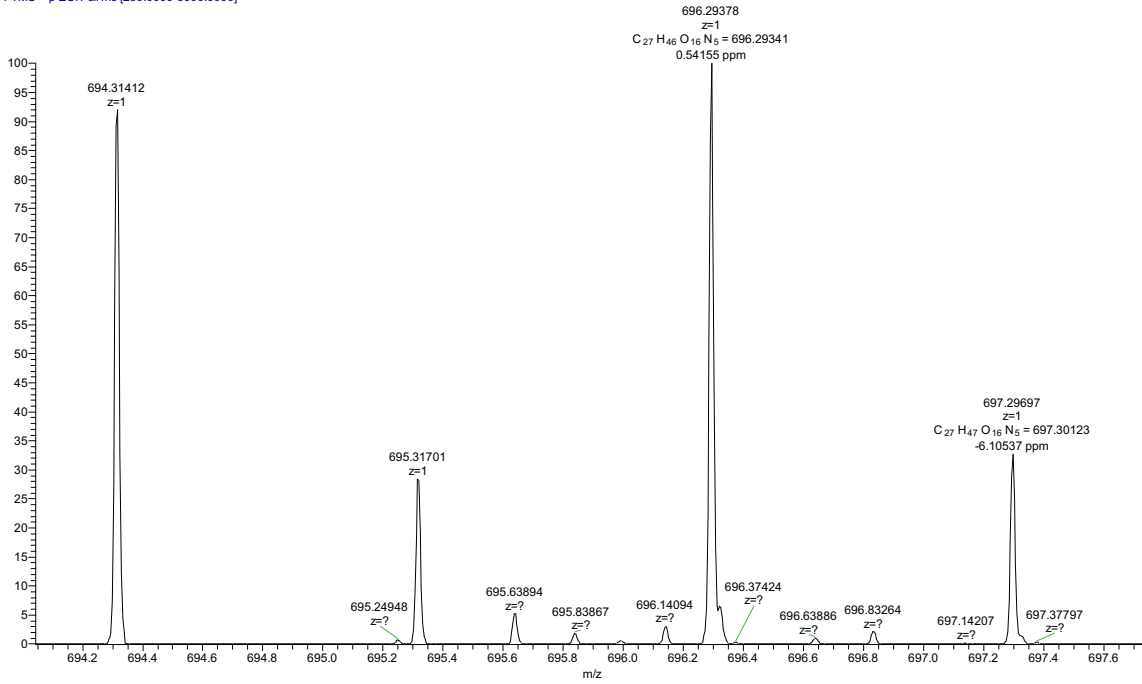

## Compound GM-Tripeptide (Entry #2)

Grimes\_Kimberly\_LA1 #676-700 RT: 1.44-1.48 AV: 4 NL: 2.65E8  
T: FTMS + p ESI Full ms [250.0000-3000.0000]

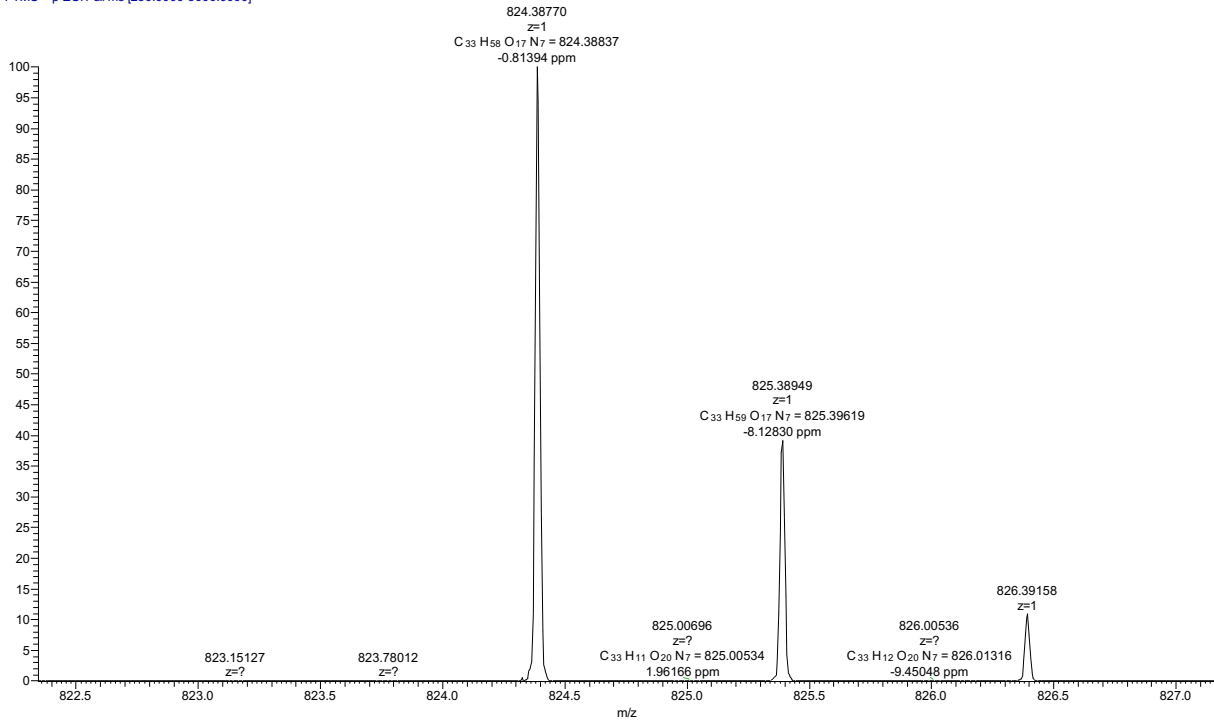

### Compound GM-Tetrapeptide (Entry #3)

Grimes\_Kimberly\_LA1 #1069-1146 RT: 2.24-2.39 AV: 13 NL: 7.36E7  
T: FTMS + p ESI Full ms [250.0000-3000.0000]

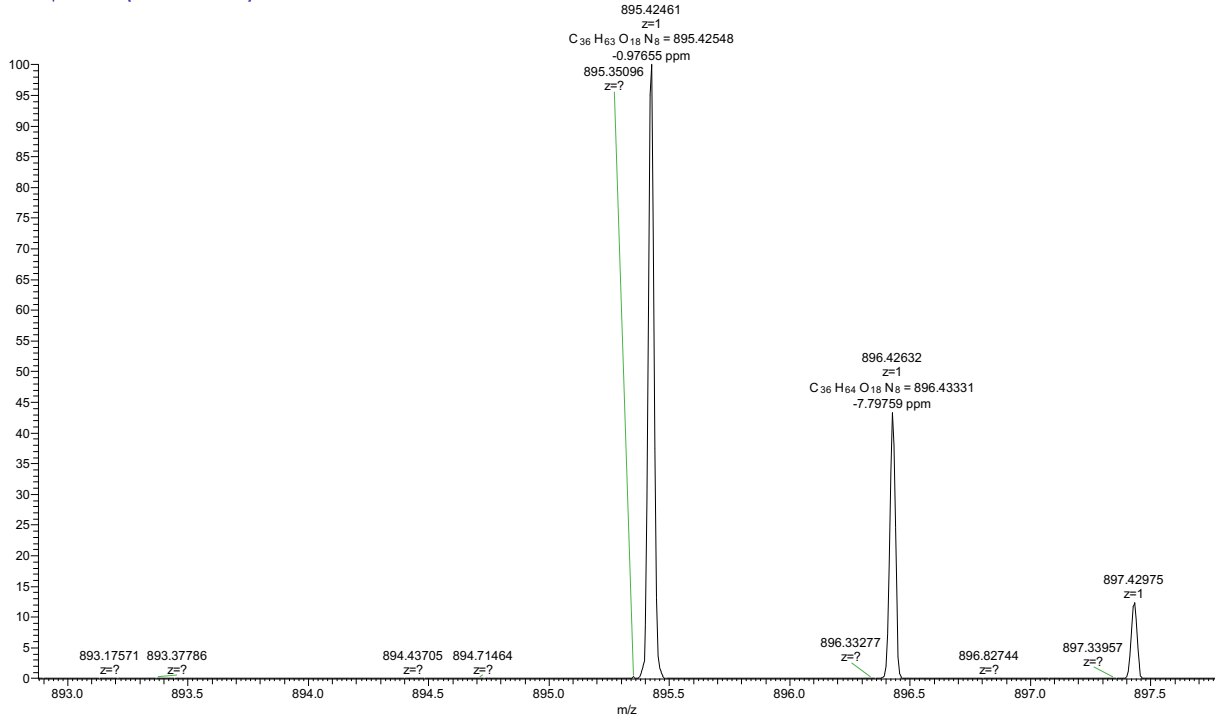

### Compound GM-Pentapeptide (Entry #4)

Grimes\_Kimberly\_LA1 #1111-1130 RT: 2.33-2.36 AV: 4 NL: 4.36E6  
T: FTMS + p ESI Full ms [250.0000-3000.0000]

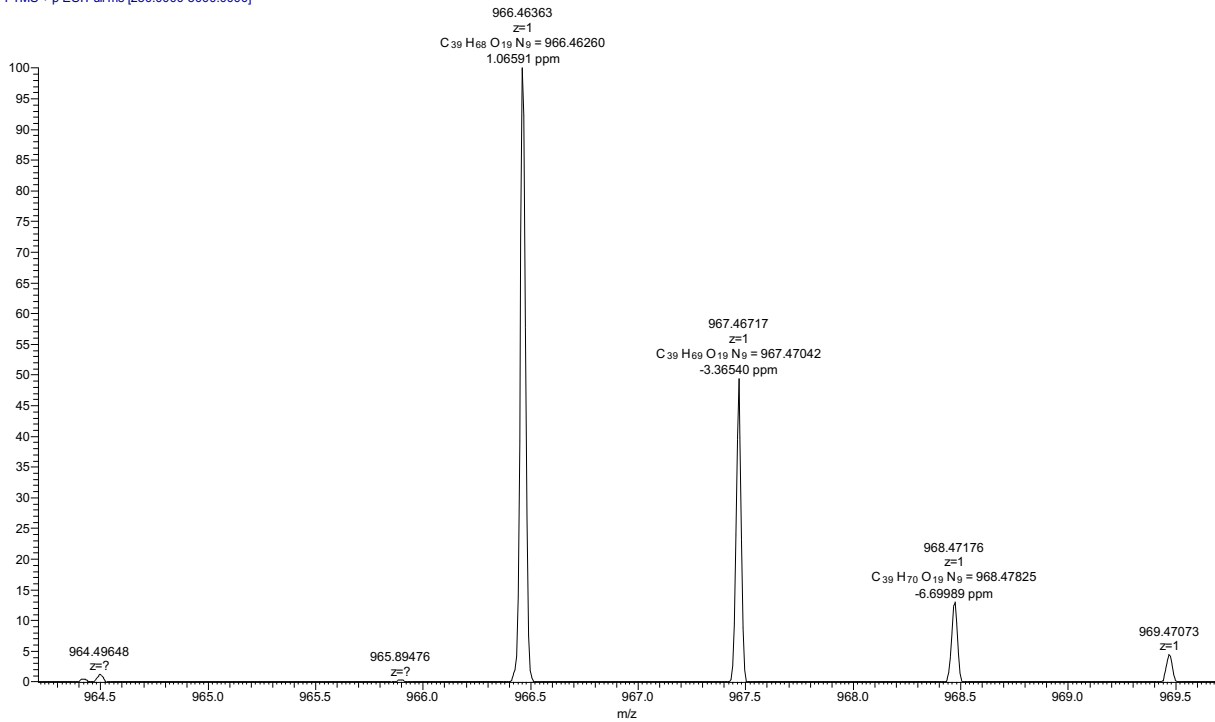

## VIII. NMR Spectra of Synthetic Compounds

### Compound (1) in D<sub>2</sub>O

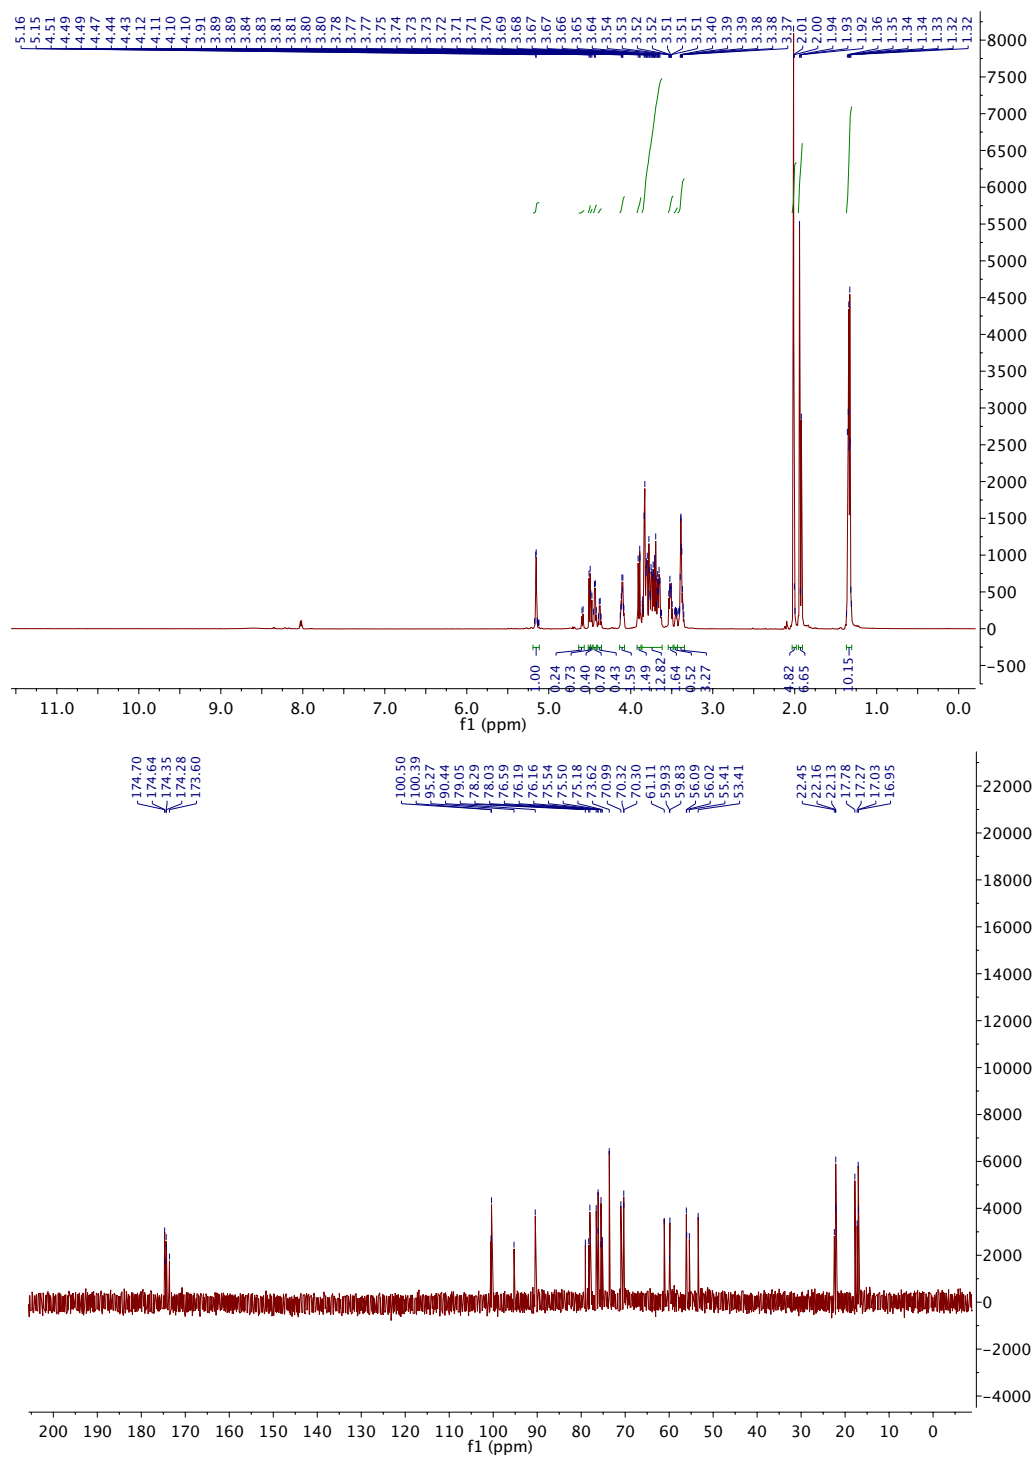

Compound (11) DMSO-d6

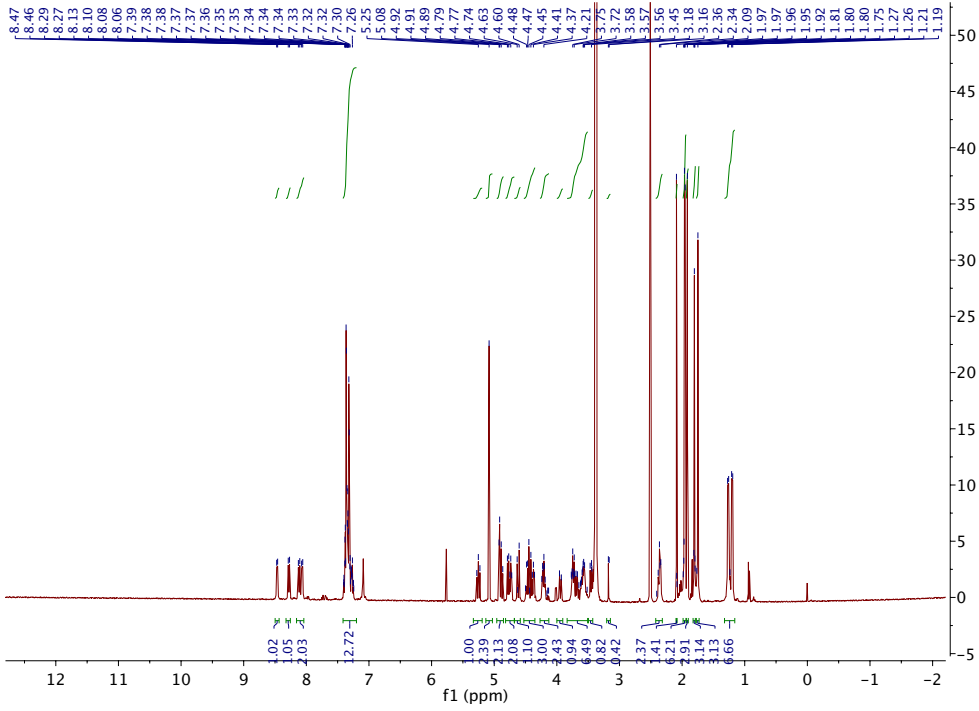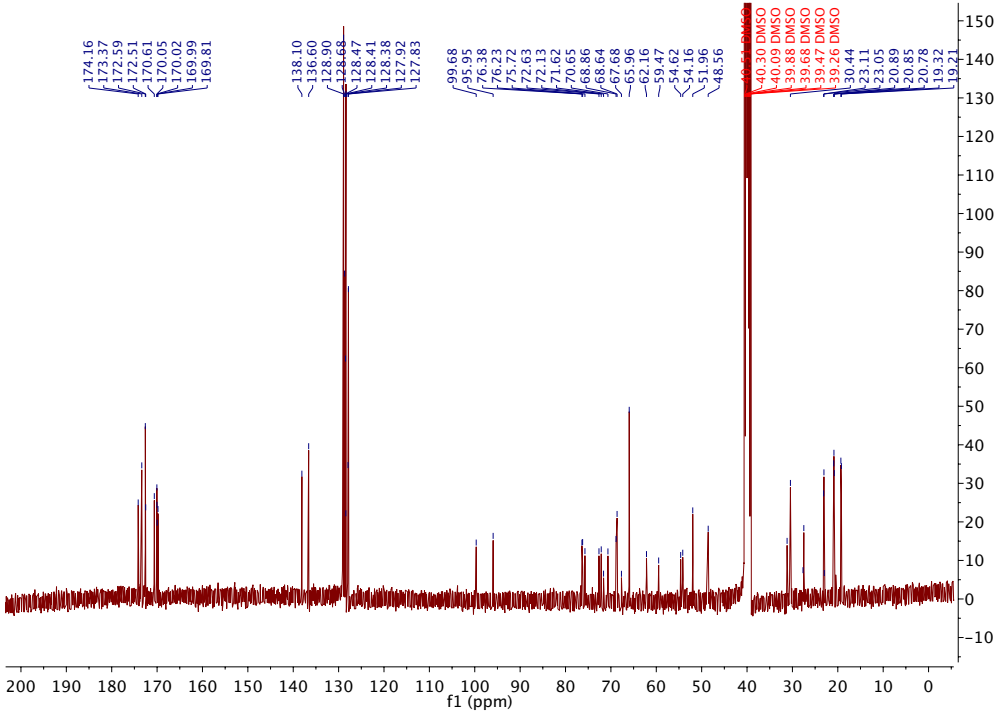



Compound (2) NMR in D<sub>2</sub>O

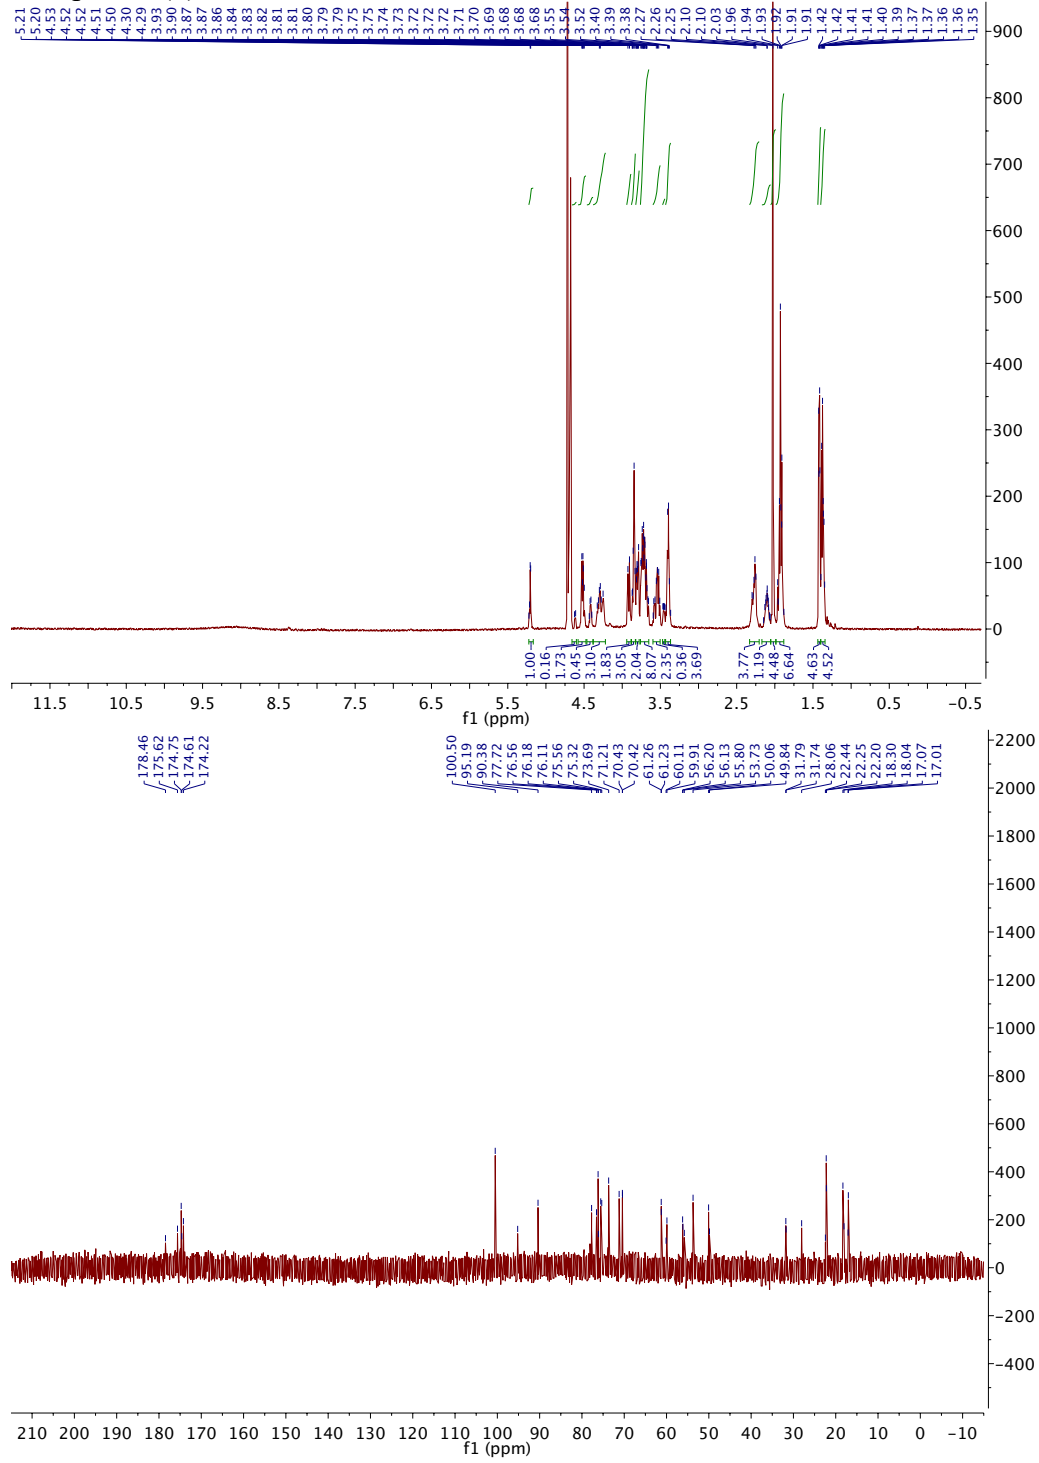

Compound (12) DMSO-d6

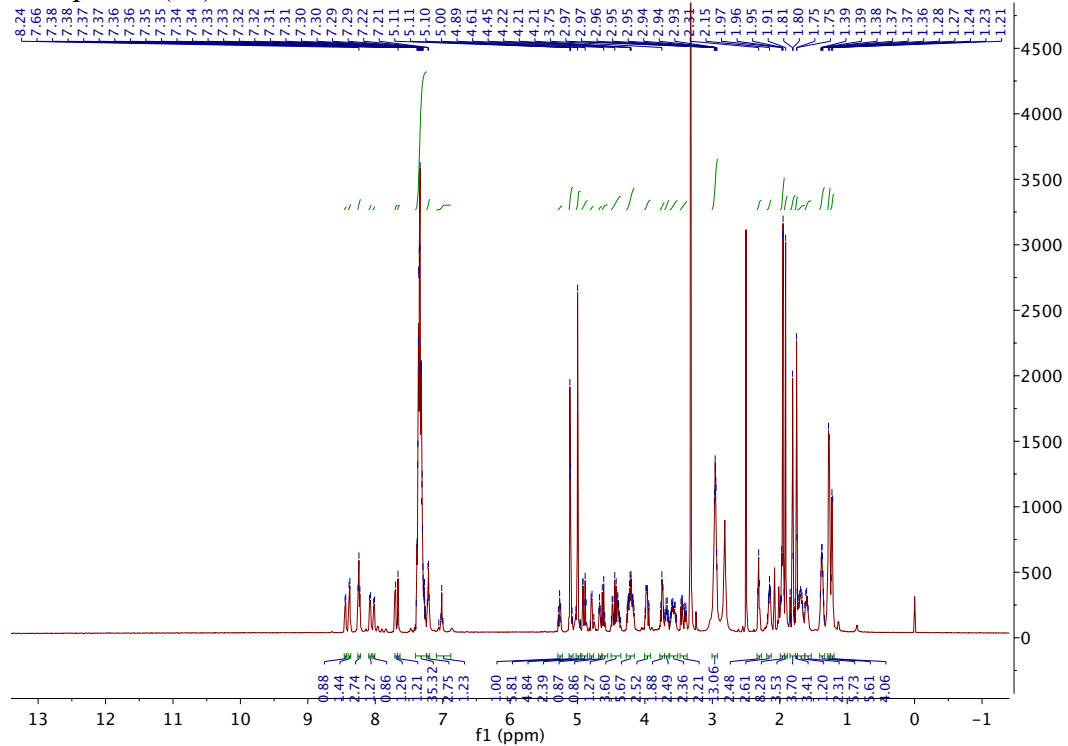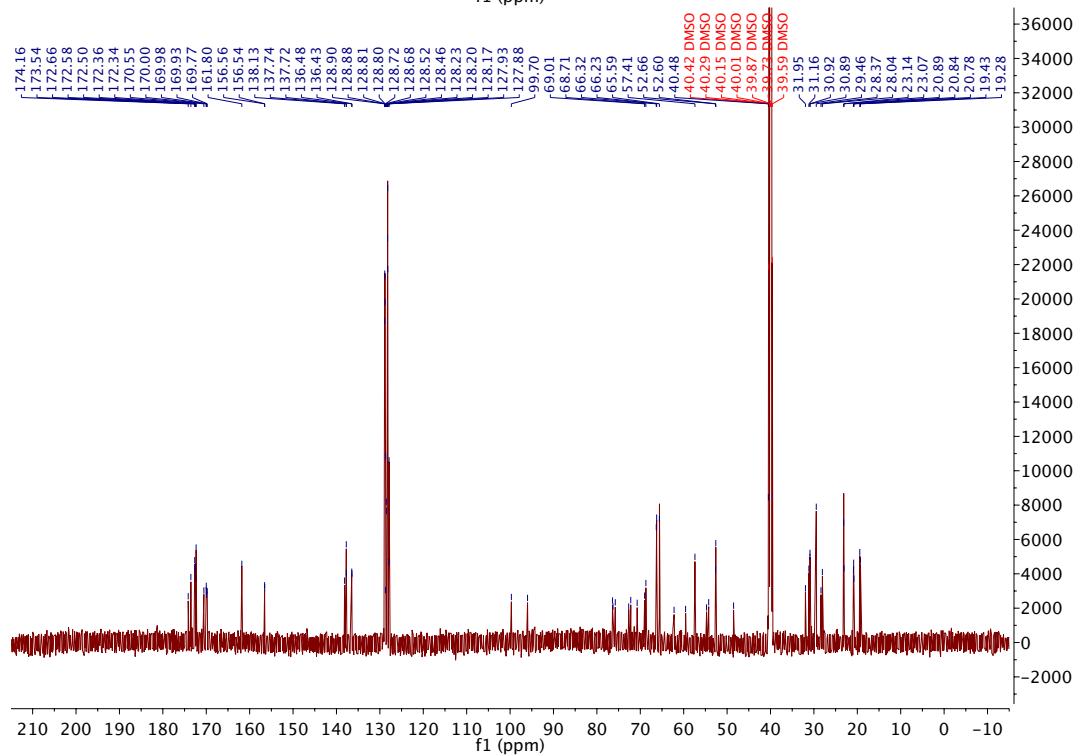

Compound (3) in D<sub>2</sub>O

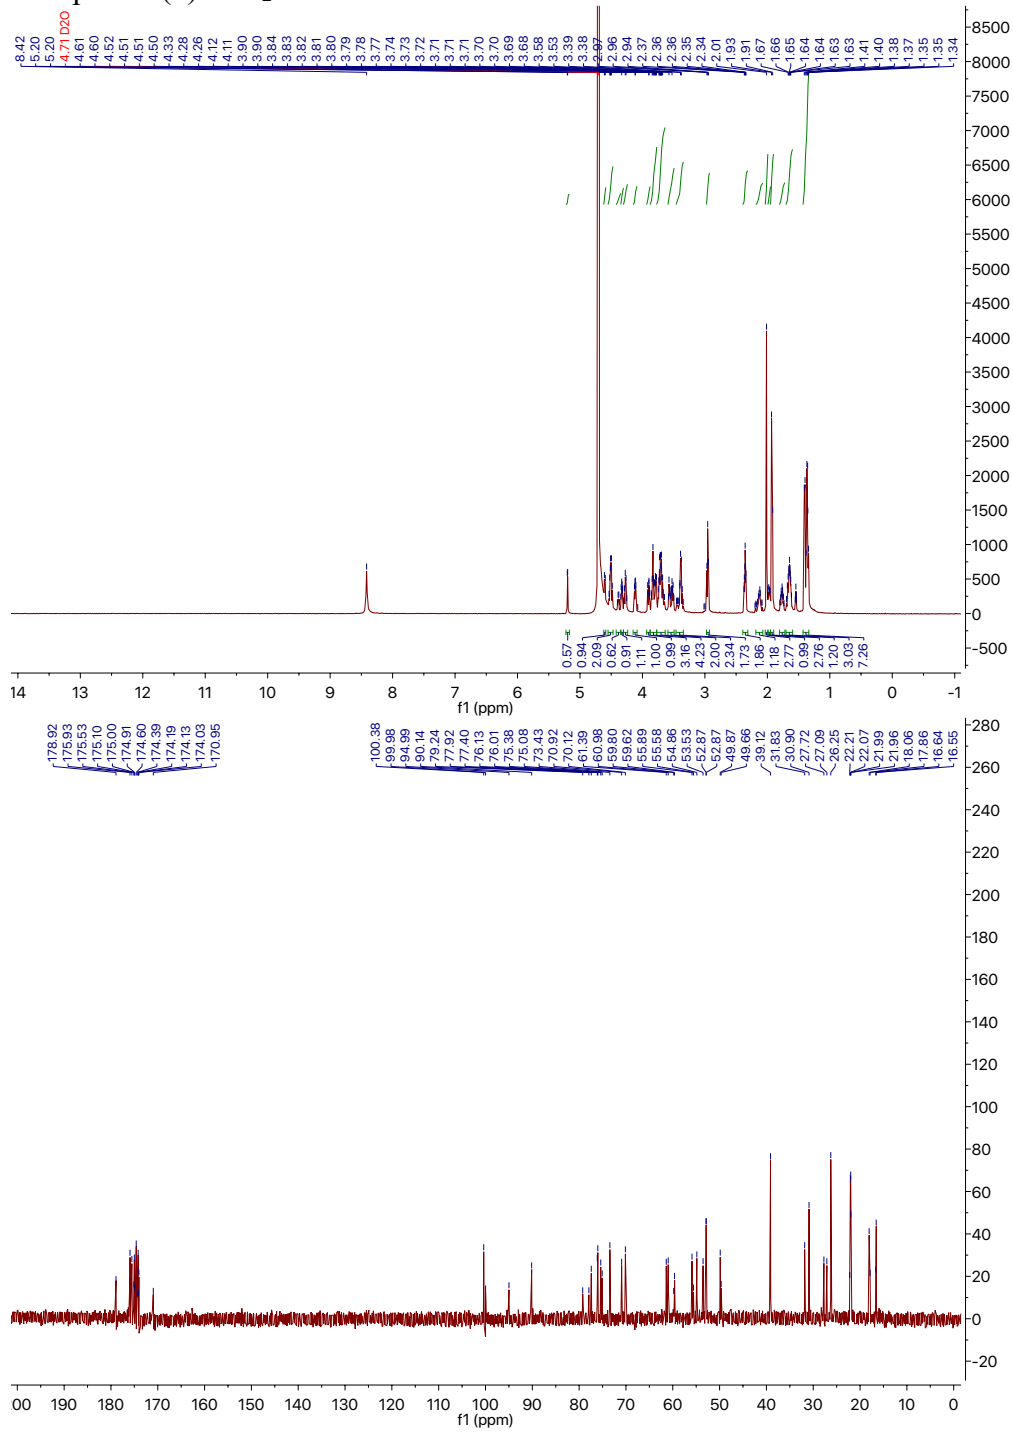

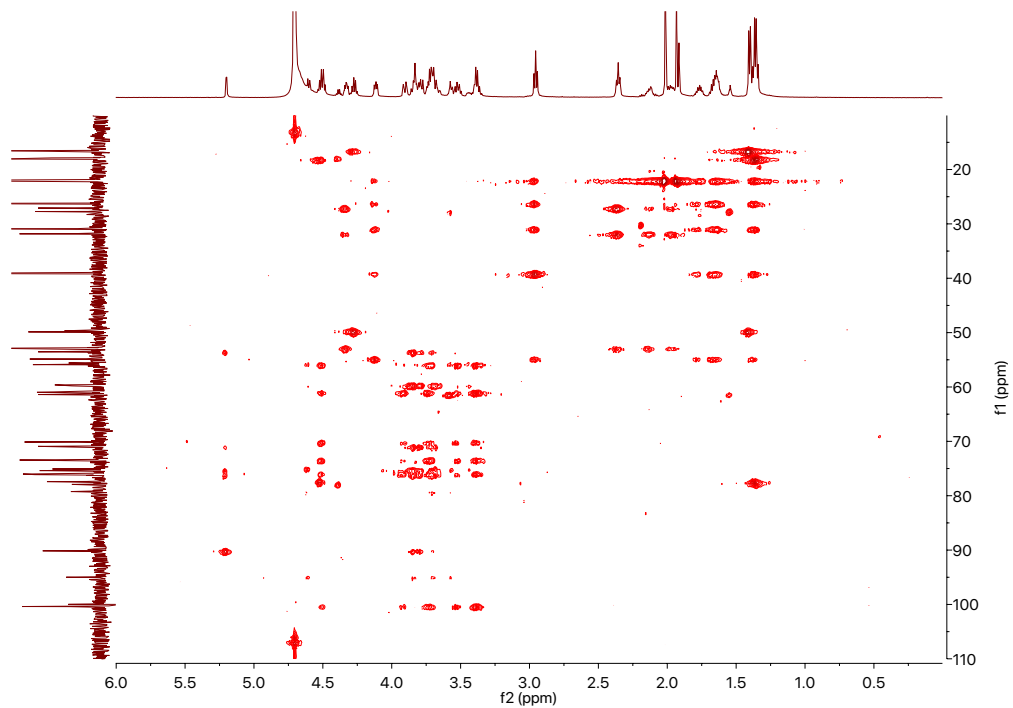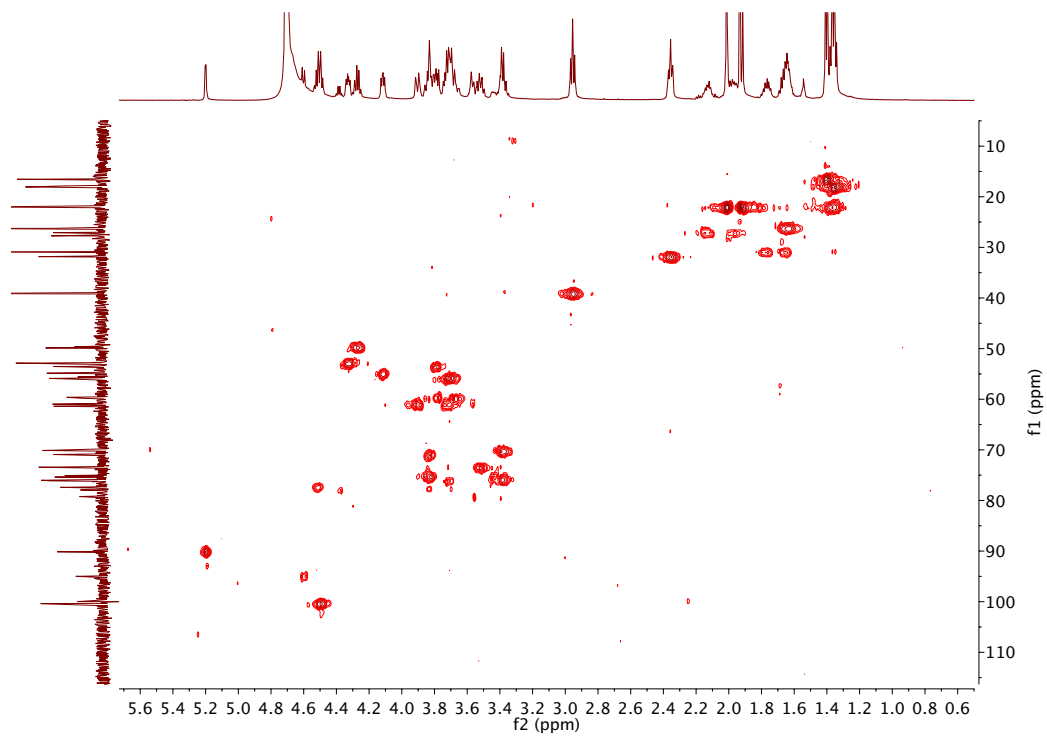

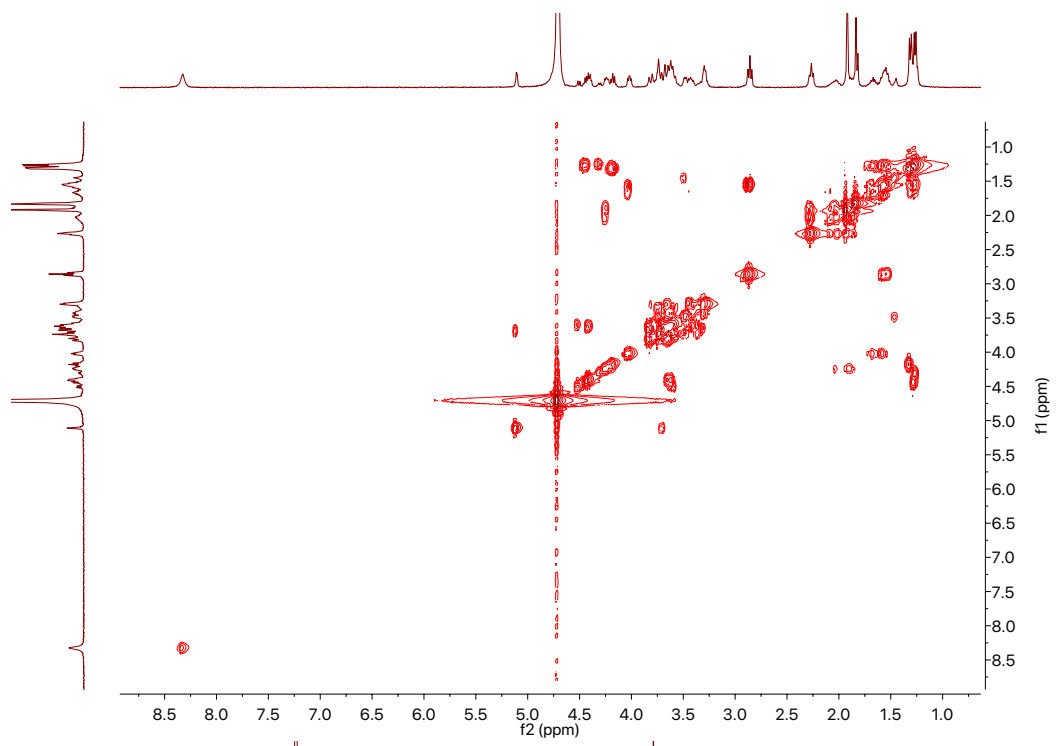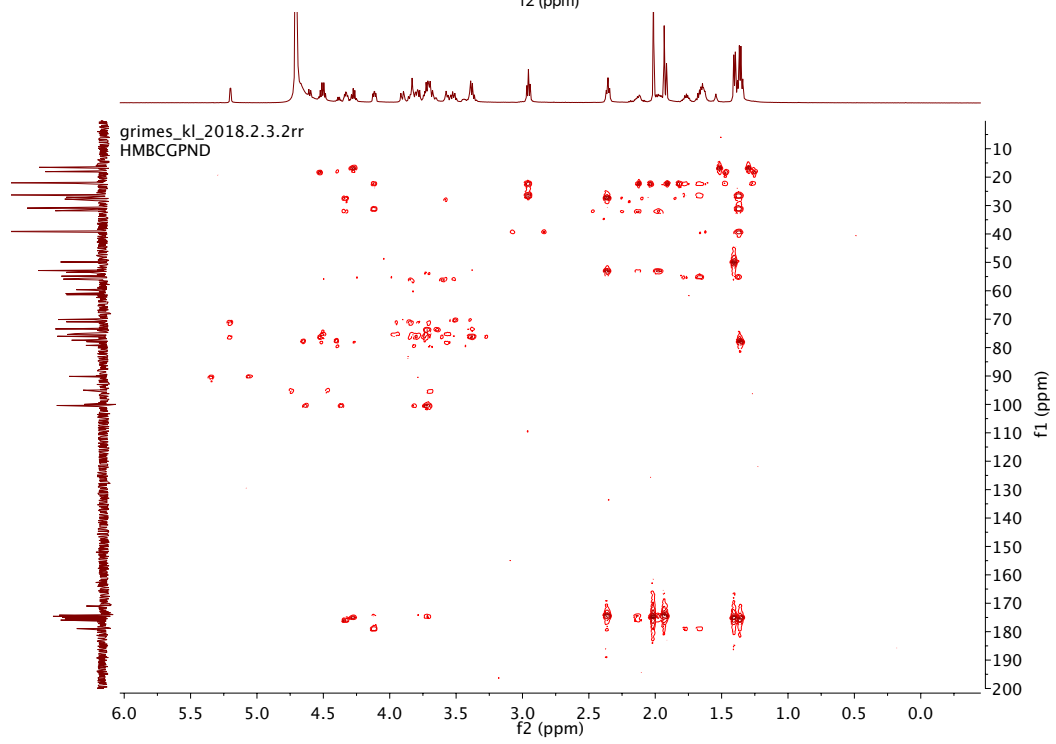

# IX. HRMS Spectra of Synthetic Compounds

## Compound (1) HRMS Spectra

Grimes\_Klare\_KL-4-53B #40-82 RT: 0.21-0.36 AV: 4 NL: 6.26E7  
T: FTMS + p ESI Full ms [100.00-1500.00]

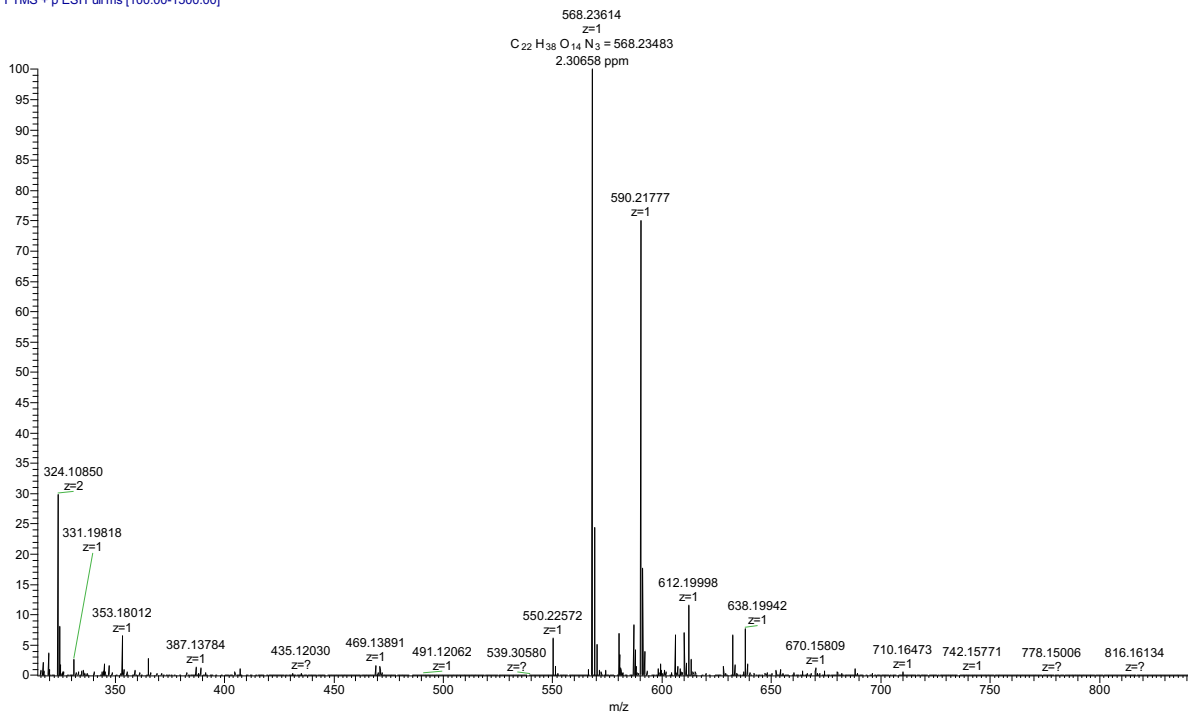

## Compound (11) HRMS Spectra

Grimes\_Klare\_KL-4-46 #50-67 RT: 0.26-0.31 AV: 2 NL: 1.91E8  
T: FTMS + p ESI Full ms [100.00-1500.00]

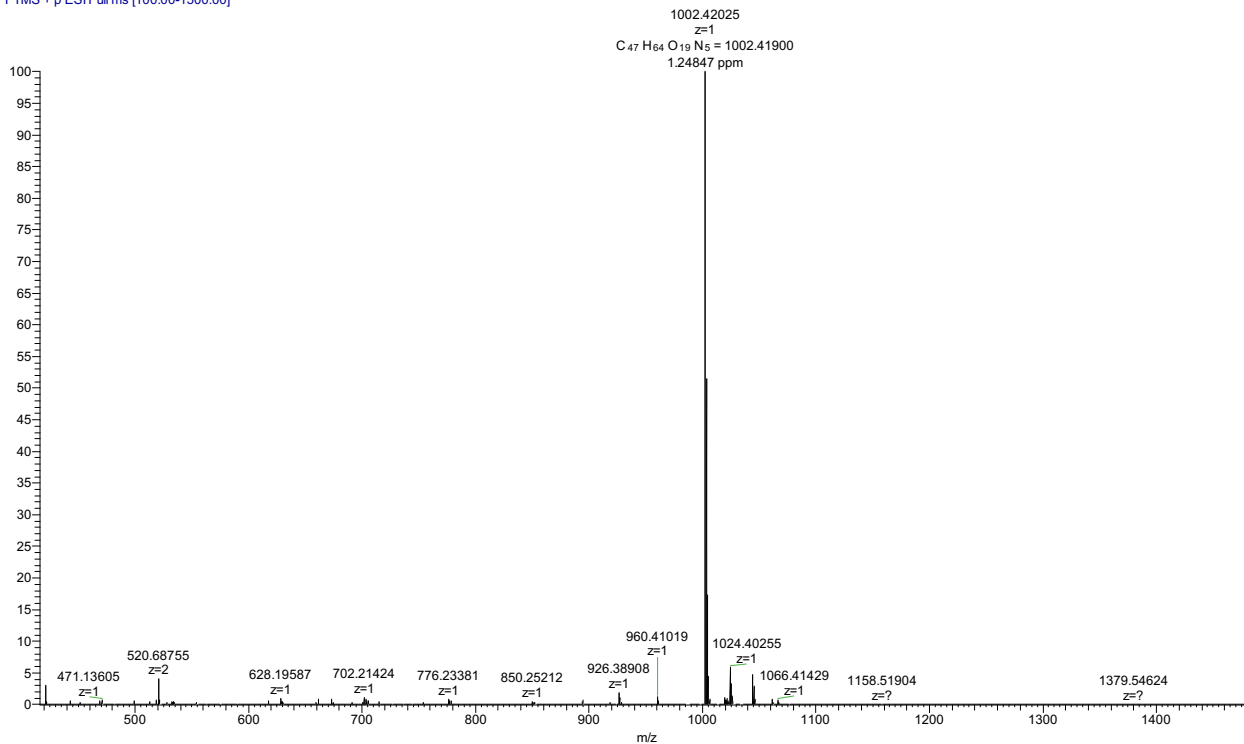

## Compound (2) HRMS Spectra

Grimes\_Klare\_KL-4-56B #7-45 RT: 0.07-0.17 AV: 3 NL: 7.61E7  
T: FTMS + p ESI Full ms [150.00-1500.00]

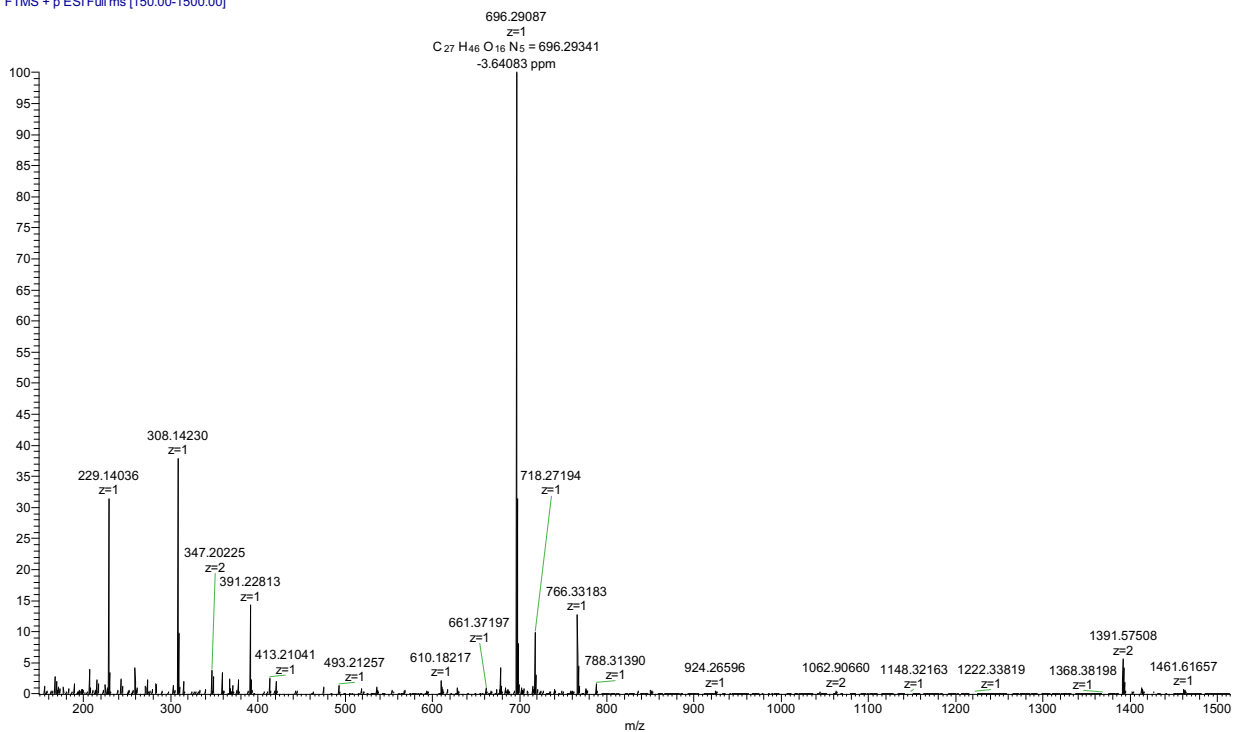

## Compound (12) HRMS Spectra

Grimes\_Klare\_KL-4-58-B2 #54-95 RT: 0.26-0.41 AV: 4 NL: 3.91E6  
T: FTMS + p ESI Full ms [150.0000-1500.0000]

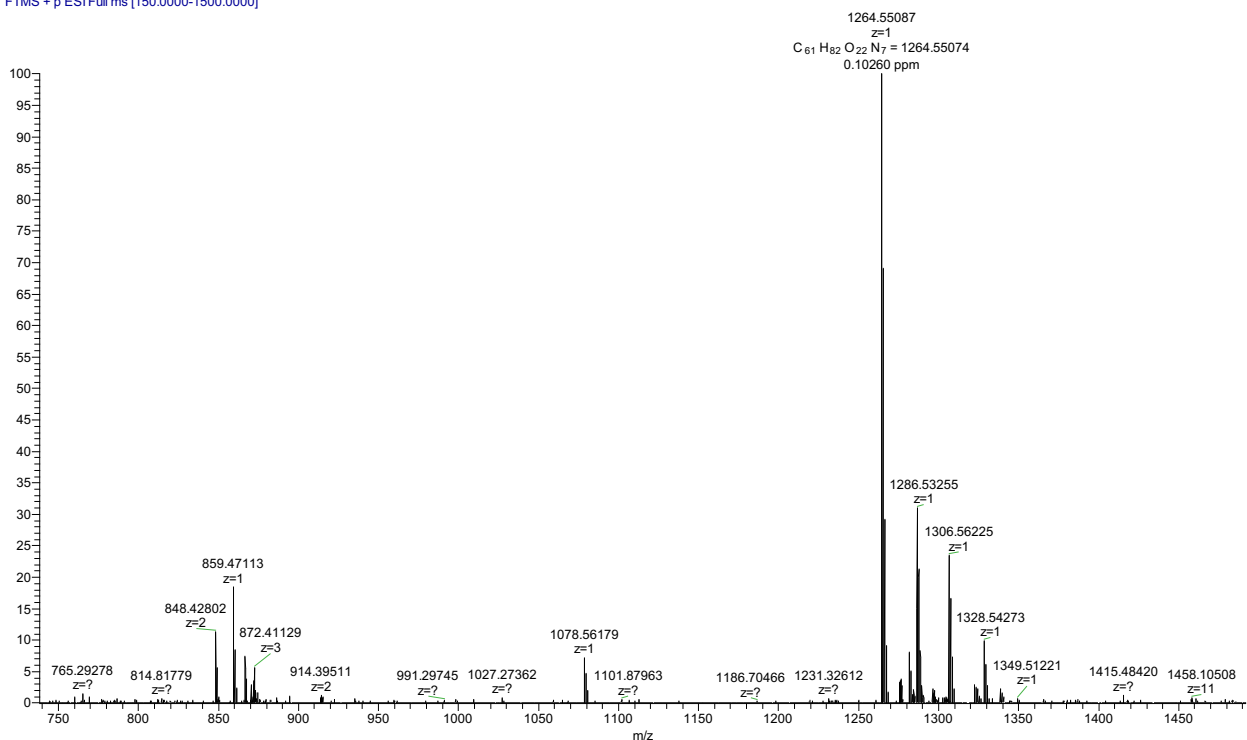

## Compound (3) HRMS Spectra

Grimes\_Klare\_KL-4-74B #53-113 RT: 0.26-0.51 AV: 6 NL: 5.83E7  
T: FTMS + p ESI Full ms [150.0000-1500.0000]

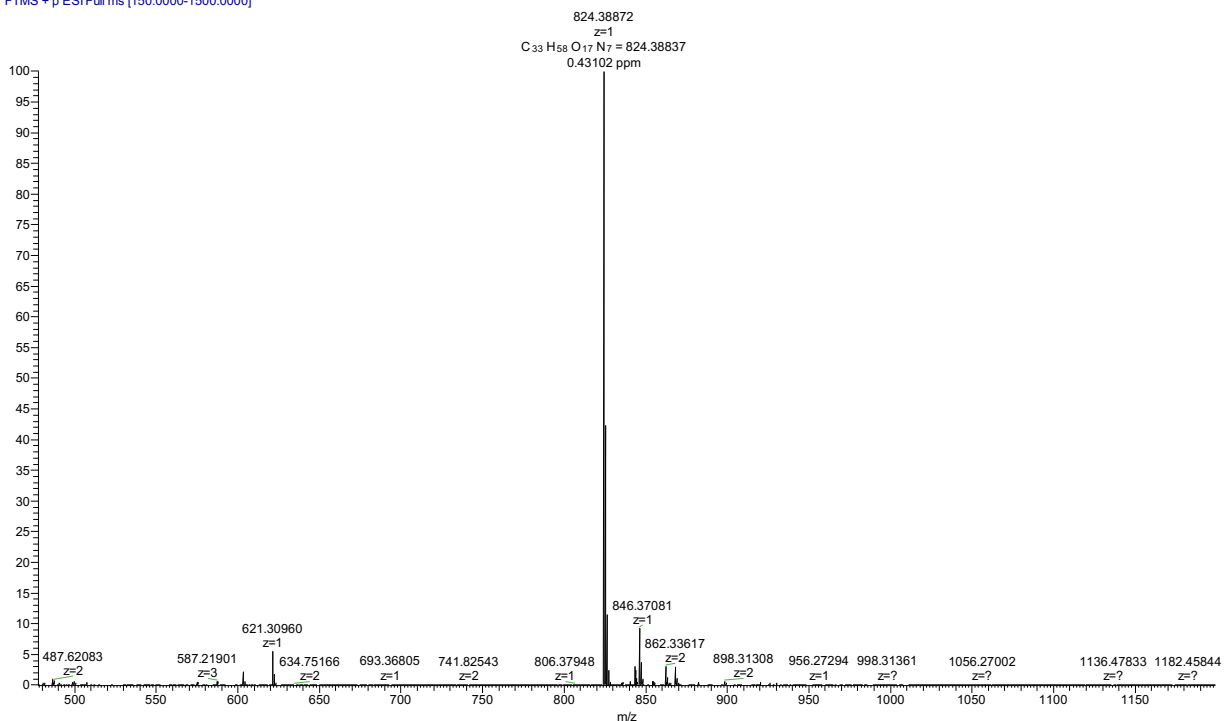

## X. References

- [1] aJ. M. Burch, S. Mashayekh, D. D. Wykoff, C. L. Grimes, *ACS Infectious Diseases* **2018**, *4*, 53-58; bJ. E. Melnyk, V. Mohanan, A. K. Schaefer, C.-W. Hou, C. L. Grimes, *Journal of the American Chemical Society* **2015**, *137*, 6987-6990.
- [2] aK. Lazor, J. Zhou, K. DeMeester, E. D'Ambrosio, C. L. Grimes, *ChemBioChem*, *0*; bC.-Y. Liu, C.-W. Guo, Y.-F. Chang, J.-T. Wang, H.-W. Shih, Y.-F. Hsu, C.-W. Chen, S.-K. Chen, Y.-C. Wang, T.-J. R. Cheng, C. Ma, C.-H. Wong, J.-M. Fang, W.-C. Cheng, *Organic Letters* **2010**, *12*, 1608-1611; cB. Schwartz, J. A. Markwalder, Y. Wang, *Journal of the American Chemical Society* **2001**, *123*, 11638-11643.
- [3] Y. Fujimoto, Y. Konishi, O. Kubo, M. Hasegawa, N. Inohara, K. Fukase, *Tetrahedron Letters* **2009**, *50*, 3631-3634.
- [4] Y. Zhao, R. Zagani, S.-M. Park, N. Yoshida, P. Shah, H.-C. Reinecker, *Nature Communications* **2019**, *10*, 1349.
- [5] aC.-W. Hou, V. Mohanan, N. E. Zachara, C. L. Grimes, *Glycobiology* **2015**, *26*, 13-18; bV. Mohanan, C. L. Grimes, *The Journal of biological chemistry* **2014**, *289*, 18987-18998.
- [6] H. Liang, K. E. DeMeester, C.-W. Hou, M. A. Parent, J. L. Caplan, C. L. Grimes, *Nature Communications* **2017**, *8*, 15015.
